1 **Title:** Transcriptional Landscape of Ectomycorrhizal Fungi and Their Host Provide  
2 Insight into N Uptake from Forest Soil

3 **Running title:** Transcriptional response of fungi and beech to N

4 **Authors**

5 Carmen Alicia Rivera Pérez<sup>a#</sup>, Dennis Janz<sup>a</sup>, Dominik Schneider<sup>b</sup>, Rolf Daniel<sup>b</sup>, Andrea  
6 Polle<sup>a</sup>

7 **Affiliations**

8 <sup>a</sup>Forest Botany and Tree Physiology, Büsgen Institute, Georg-August-University  
9 Göttingen, Büsgenweg 2, 37077 Göttingen, Germany

10 <sup>b</sup>Department of Genomic and Applied Microbiology and Göttingen Genomics  
11 Laboratory, Institute of Microbiology and Genetics, Georg-August-University Göttingen,  
12 Grisebachstrasse 8, 37077, Göttingen, Germany

13 #Correspondence: [rivera@gwdg.de](mailto:rivera@gwdg.de)

14 **Word count** (abstract: 240/250; importance: 149/150; text: 4,862/5,000).

15 **ABSTRACT** Mineral nitrogen (N) is a major nutrient showing strong fluctuations in the  
16 environment due to anthropogenic activities. Acquisition and translocation of N to forest  
17 trees is achieved by highly diverse ectomycorrhizal fungi (EMF) living in symbioses with  
18 their host roots. Here, we examined colonized root tips to characterize the entire root-  
19 associated fungal community by DNA metabarcoding-Illumina sequencing of the fungal  
20 ITS2 molecular marker and used RNA sequencing to target metabolically active fungi  
21 and the plant transcriptome after N application. The study was conducted with beech  
22 (*Fagus sylvatica* L), a dominant tree species in central Europe, grown in native forest  
23 soil. We demonstrate strong enrichment of  $^{15}\text{N}$  from nitrate or ammonium in the  
24 ectomycorrhizal roots by stable isotope labeling. The relative abundance of the EMF  
25 members in the fungal community was correlated with their transcriptional abundances.  
26 The fungal metatranscriptome covered KEGG and KOG categories similar to model  
27 fungi and did not reveal significant changes related to N metabolism but species-  
28 specific transcription patterns, supporting trait stability. In contrast to the resistance of  
29 the fungal metatranscriptome, the transcriptome of the host exhibited dedicated nitrate-  
30 or ammonium-responsive changes with upregulation of transporters and enzymes  
31 required for nitrate reduction and drastic enhancement of glutamine synthetase  
32 transcript levels, indicating channeling of ammonium into the pathway for plant protein  
33 biosynthesis. Our results support that self-composed fungal communities associated  
34 with tree roots buffer nutritional signals in their own metabolism but do not shield plants  
35 from high environmental N.

36 **IMPORTANCE** Although EMF are well known for their role in supporting tree N nutrition,  
37 the molecular mechanisms underlying N flux from the soil solution into the host through

38 the ectomycorrhizal pathway remain widely unknown. Furthermore, ammonium and  
39 nitrate availability in the soil solution is subject to constant oscillations that create a  
40 dynamic environment for the tree roots and associated microbes during N acquisition.  
41 Therefore, it is important to understand how root-associated mycobiomes and the tree  
42 roots handle these fluctuations. We studied the response of the symbiotic partners by  
43 screening their transcriptomes after a sudden environmental flux of nitrate or  
44 ammonium. We show that the fungi and the host respond asynchronously, with the  
45 fungi displaying resistance to increased nitrate or ammonium, and the host dynamically  
46 metabolizing the supplied N sources. This study provides insights into the molecular  
47 mechanisms of the symbiotic partners operating under N enrichment in a  
48 multidimensional symbiotic system.

49 **KEYWORDS** ammonium, *Fagus sylvatica*, fungi, metatranscriptome, mycorrhiza,  
50 nitrate, nitrogen stress, symbiosis

51 **Soil N availability** is generally a main limiting factor for primary productivity across  
52 terrestrial ecosystems including temperate forests (1, 2). In forest soil, soluble mineral N  
53 pools consist of nitrate and ammonium, whose quantities fluctuate in time and space,  
54 depending on soil properties, meteorological conditions, anthropogenic N inputs and  
55 biological processes such as mineralization, immobilization, and denitrification (3–12).  
56 While nitrate ions are highly mobile in soil solution and easily lost by leaching,  
57 ammonium cations are generally bound to soil colloids and retained in topsoil (13, 14).  
58 Consequently, mineral N nutrition of plants and microbes must cope with dynamic N  
59 availabilities in the environment.

60           The mutualistic association of certain soil EMF species with the root tips of forest  
61 trees is an ecological advantage to support nutrition of the host from variable  
62 environmental N sources (15–20). The vast majority of the root systems of individual  
63 trees in temperate forests are naturally colonized by a diverse spectrum of EMF species  
64 forming compound organs known as ectomycorrhizas and variably composed fungal  
65 communities (21–24). These ectomycorrhizas consist of root and fungal cells that  
66 mediate bidirectional nutrient exchange. EMF acquire N from the environment and  
67 transfer it to the root and receive host-derived carbon in return (25, 26). In self-  
68 assembled ectomycorrhizas, EMF show strong interspecific differences for N acquisition  
69 (27, 28). Early laboratory experiments showed that when the mycelium of EMF  
70 colonizing the roots of *Pinus sylvestris* and *Fagus sylvatica* was supplied with either  
71 ammonium or nitrate, the N sources became predominantly incorporated into the amino  
72 acids glutamate, glutamine, aspartate, asparagine and alanine (29, 30). When  
73 ammonium and nitrate were supplied at equimolar quantities to the mycelium of *Paxillus*  
74 *involutus*, ammonium incorporation into amino acids occurred in the fungus and nitrate  
75 remained almost unchanged, suggesting that EMF assimilate ammonium more readily  
76 than nitrate into amino acids prior to delivering it to the plant (31). Despite known  
77 discrimination between nitrate and ammonium (32, 33), most EMF have a widespread  
78 ability to metabolize nitrate (34, 35). Silencing the nitrate reductase (NR) gene in  
79 *Laccaria bicolor* impaired the formation of mycorrhizas with poplar (36) implying an  
80 important role of EMF in nitrate acquisition for the host.

81           The process of N transfer to the host through the mycorrhizal pathway starts at  
82 the soil-fungal interface, where different N forms are taken up from the soil solution by

83 fungal membrane transporters, N is then translocated through the fungal mantle, which  
84 wraps the root tip, into the intraradical hyphae, and finally exported to the symbiotic  
85 interface becoming available for the plant (37–42). Studies on *Amanita muscaria*,  
86 *Hebeloma cylindrosporium*, *L. bicolor* and *Tuber melanosporum* have led to the  
87 hypotheses that ammonium is exported from the intraradical hyphae to the symbiotic  
88 interface through Ammonia/Ammonium Transport Out (Ato) proteins, voltage-dependent  
89 cation channels, and aquaporins (37, 43–46), and that amino acid export could occur  
90 through Acids Quinidine Resistance 1 proteins in *L. bicolor* and *H. cylindrosporium* (38,  
91 44, 47). Moreover, the EMF-mediated import of ammonium and nitrate into the roots is  
92 supported by upregulation of ammonium transporters (43) and nitrate transporter (*NRT*)  
93 genes in ectomycorrhizal poplar roots like *PttNRT2.4A* with *A. muscaria* (48) and  
94 *PcNRT1.1* and *PcNRT2.1* with *P. involutus* (49).

95         Once nitrate is taken up by NRTs, it is intracellularly reduced to nitrite by NR,  
96 then to ammonium by NiR and ammonium is ultimately incorporated into glutamine and  
97 glutamate (47, 50, 51). In the cyclic GS-GOGAT pathway, glutamine synthetase (GS)  
98 catalyzes the formation of glutamine by transfer of ammonium to glutamate. Then  
99 glutamate synthase (GOGAT) transfers the amino group from glutamine to 2-  
100 oxoglutarate generating two molecules of glutamate, whereas in the alternative  
101 pathway, the enzyme glutamate dehydrogenase (GDH) catalyzes the reductive  
102 amination of one molecule of 2-oxoglutarate using ammonium to generate one molecule  
103 of glutamate (50, 51). Both GS/GOGAT and GDH pathways operate in EMF but  
104 variations are common among species or symbiotic systems depending on the plant  
105 and fungal partners (52–54). In contrast to EMF, in plants the GS/GOGAT pathway

106 predominates and GDH plays a minor role in ammonium incorporation into organic N  
107 forms (55). Currently, the molecular processes used by EMF for supplying mineral N to  
108 the host in field conditions are unknown. Uncovering these molecular activities will  
109 enable a better understanding of tree N nutrition and N cycling in the ecosystem.

110         Despite the well-recognized importance of the mycorrhizal pathway as a relevant  
111 route whereby tree roots acquire N, knowledge of the molecular mechanisms operating  
112 in the uptake, transport, and delivery of N to the host is limited to a few model EMF. It is  
113 also unknown how EMF and the colonized root cells respond to variation in mineral N  
114 availabilities. The “1000 Fungal Genomes Project” (56) along with the *Fagus sylvatica*  
115 genome (57) provide a platform for disentangling fungal and plant transcriptional profiles  
116 in self-assembled communities engaged in active symbioses. We took advantage of  
117 new tools to unravel these responses in natural forest soil administering a N dose  
118 corresponding to 29 kg N ha<sup>-1</sup> yr<sup>-1</sup>, a quantity in the range of an N saturated beech  
119 forest (58, 59). To control N uptake and to distinguish responses to different N forms,  
120 we fertilized with either <sup>15</sup>N-labeled ammonium or <sup>15</sup>N-labeled nitrate and then studied  
121 transcriptional responses separately for EMF and the host trees using ectomycorrhizal  
122 root tips (EMRTs). We used DNA-barcoding to describe the composition of the root-  
123 associated fungal community and RNA sequencing to capture the metabolically active  
124 fungi. We hypothesized that (i) the fungal community structure is unaffected after short-  
125 term exposure to elevated N and that (ii) the transcriptional responses of metabolically  
126 active EMF reveal molecular activities related to uptake and assimilation of nitrate and  
127 ammonium. Since nitrate assimilation requires a series of reduction steps into  
128 ammonium before its incorporation into amino acids, both distinct and overlapping

129 responses to nitrate and ammonium availability were expected to be imprinted in the  
130 transcription profiles of the symbiotic partners. Furthermore, we hypothesized that (iii)  
131 EMF buffer environmental fluctuations in N for the plant resulting in strong N-induced  
132 responses in the fungal metatranscriptome but only marginal effects in the root  
133 transcriptome, or alternatively that (iv) the entire symbiotic system forms a “holobiont”  
134 where the host and the EMF partners display synchronized and similar N-responses.

## 135 **RESULTS**

136 **Abundance of root-associated fungal genera corresponds to**  
137 **transcriptional abundance.** The global fungal community associated with beech roots  
138 in this experiment was dominated by six genera containing ectomycorrhizal (*Amanita*:  
139 7.18%, *Cenococcum*: 9.05%, *Scleroderma*: 4.83%, *Xerocomus*: 29.17%), ericoid  
140 (*Oidiodendron*: 1.09%) and saprotrophic fungi (*Mycena*: 3.75%) (Fig. 1A; Data set 1).  
141 The remaining taxa were rare (< 1% per genus) and belonged to the phyla of  
142 Ascomycota (2.31%), Basidiomycota (2.51%), Mucoromycota (0.11%),  
143 Mortierellomycota (0.02%), and fungi of unknown phylogenetic lineage (39.98%) (Fig.  
144 1A; Data set 1). We did not detect any significant effects of short-term ammonium or  
145 nitrate treatment on fungal OTU richness ( $F_{2,9} = 0.288$ ,  $p = 0.756$ ), on Shannon diversity  
146 ( $F_{2,9} = 0.437$ ,  $p = 0.659$ ) (Table S1), or on the composition of the fungal OTU  
147 assemblages ( $R^2 = 0.146$ , pseudo- $F_{2,9} = 0.767$ ,  $p = 0.861$ , permutations = 9999, adonis,  
148 Fig. S1A).

149 Similarly as for the fungal OTUs, we aggregated the RNA counts of  
150 ectomycorrhizal fungi belonging the same genus (Fig. 1B). The transcript abundances  
151 obtained for individual genera were variable within replicates and treatment groups.

152 However, there were no significant differences among the fungal metatranscriptomes in  
153 the nitrate, ammonium or control treatments ( $R^2= 0.198$ , pseudo- $F_{2,9}= 1.110$ ,  $p= 0.353$ ,  
154 permutations = 9999, adonis) (Fig. 1B; Fig. S1B). The transcript abundance of a specific  
155 fungal genus was strongly correlated with the ITS-based abundance of that same genus  
156 ( $R= 0.66$ ,  $p< 0.001$ , Pearson, Fig. 1C), supporting that the metabolic activities of  
157 abundant fungi associated with the beech roots were reflected. Fungi with low  
158 abundances as determined by the DNA-based approach also showed significant  
159 transcript abundances (Fig. 1C), implying that low-abundant fungi still may contribute  
160 significantly to the molecular activities of the root mycobiome.

161 **Fungal metatranscriptomes cover fungal metabolism which hardly respond**  
162 **to N treatments.** The RNA data containing ectomycorrhizal, ericoid mycorrhiza,  
163 endophyte and saprotrophic fungi comprised a total of 175,531 transcript identifiers or  
164 gene models, covering 3,759 unique Eukaryotic Orthologous Groups of protein  
165 identifiers (KOGs). From these, 122,437 transcript ids (covering 3,708 unique KOGs)  
166 belong purely to the EMF (Data set 2). After aggregating the fungi by KOGs into a  
167 metatranscriptome and normalizing in DESeq2, the full list fungal metatranscriptome (17  
168 fungi, see Table 1) resulted in 3,619 unique KOGs, whereas the EMF-specific  
169 metatranscriptome (13 EMF species, see Table 1) comprised 3,593 KOGs (Data set 3).  
170 We evaluated the molecular functions of the EMF metatranscriptome according to KOG  
171 functional classifications. All 25 KOG functions were represented and categorized into  
172 “cellular processing and signaling” (1,159 KOGs), “information, storage and processing”  
173 (956 KOGs), “Metabolism” (796 KOGs), “poorly characterized” (817 KOGs), and  
174 multiple function assignment (135 KOGs) (Fig. 2). The frequencies of these functional



175 classifications roughly reflected the same pattern of KOG frequencies present *in silico* in  
176 the model EMF *L. bicolor* and that of *Laccaria* sp. on the beech roots (Fig. 2).

177 We further tested with DESeq2 whether the KOGs belonging to the full list fungal  
178 metatranscriptome or only to the EMF metatranscriptome were significantly differentially  
179 expressed in response to ammonium or nitrate treatment relative to the controls. In  
180 response to ammonium, not a single KOG was significantly affected (Data set 3). In  
181 response to nitrate, one differentially expressed KOG was detected (KOG4381) in the  
182 full list fungal metatranscriptome and two KOGs (KOG4381 and KOG4431) in the EMF  
183 metatranscriptome (Data set 3). KOG4381 (RUN domain-containing protein) was 578-  
184 fold ( $p_{\text{adjusted}} = 0.023943$ ) and 550-fold ( $p_{\text{adjusted}} = 0.020832$ ) upregulated in the full list  
185 and in the EMF metatranscriptomes, respectively (Data set 3). This KOG's function is  
186 "signal transduction mechanisms" under the "cellular processes and signaling" category.  
187 KOG4431 (uncharacterized protein induced by hypoxia) was 2.27-fold decreased  
188 ( $p_{\text{adjusted}} = 0.020832$ ) in response to nitrate and has "poorly characterized function" (Data  
189 set 3). Two fungi (*Cenococcum geophilum* and *Xerocomus badius*) occurred in all  
190 samples (Fig. 1B), but because of overall low transcriptome coverage, we did not test  
191 differential responses to N treatments for specific fungi.

192 Mapping the EMF metatranscriptome to the KEGG pathway database with *L.*  
193 *bicolor* as reference revealed 108 metabolic pathways, including "biosynthesis of amino  
194 acids," "carbon metabolism," and "nitrogen metabolism" (Table S2). From a total of 952  
195 unique EC numbers, the complete (866) were mapped and the partial (86) were  
196 excluded to avoid inaccurate multiple reaction assignments (60). KEGG pathway  
197 enrichment analysis pooling all treatments revealed putative metabolic functions of the

198 EMF metatranscriptome with eleven significantly enriched pathways (FDR  $P_{\text{adjusted}}$   
199  $<0.05$ ), mainly for energy, carbon, amino acid and N metabolism:  
200 “glycolysis/gluco-genesis,” “pentose phosphate pathway,” “pyruvate metabolism,” “amino  
201 sugar and nucleotide sugar metabolism,” “pyrimidine metabolism,” “biosynthesis of  
202 amino acids,” “arginine biosynthesis” (Table 2). While “nitrogen metabolism” was  
203 covered but not significant ( $P = 0.063$ ) with the enzymes GS (EC 6.3.1.2), GDH (EC  
204 1.4.1.2), nitrilase (EC 3.5.5.1), and carbonic anhydrase (EC 4.2.1.1). After manually  
205 searching the complete fungal transcriptional database (Data set 2), transcripts  
206 encoding proteins and enzymes for fungal N uptake and metabolism were discovered.  
207 These clustered according to the fungal species instead of putative transporter/enzyme  
208 function (Fig. 3). The samples did not clearly cluster according to treatments but formed  
209 two main clusters, one containing the majority of nitrate- and ammonium-treated  
210 samples (6/8), the controls (4/4), and 2 N-treated samples. However, these differences  
211 were not significant ( $R^2 = 0.176$ , pseudo- $F_{2,9} = 0.96161$ ,  $p = 0.475$ , adonis).

212  **$^{15}\text{N}$  application records strong N uptake by roots with increased root N**  
213 **concentrations.** The EMRTs showed a strong  $^{15}\text{N}$  enrichment in response to  $^{15}\text{NH}_4^+$   
214 and  $^{15}\text{NO}_3^-$  treatment (Table 3) although specific effects related to mineral N provision  
215 were not discovered in the EMF metatranscriptome. The  $^{15}\text{N}$  enrichment in the root  
216 system decreased with increasing distance from the root tips and was about 2-times  
217 lower in fine roots, and about 6- to 8-times lower in coarse roots than in EMRTs (Table  
218 3). The N content of the  $^{15}\text{N}$ -treated roots was slightly and significantly increased in  
219 comparison to control roots (Table 3) supporting that short-term N application caused  
220 enhanced N uptake. Thus, the N treatments triggered a significant decrease in the fine

221 root C/N ratio compared to the controls (Table 3). The soil N content was not markedly  
222 affected by  $^{15}\text{N}$  application and the  $^{15}\text{N}$  signatures of nitrate- and ammonium-treated  
223 soils did not differ (Table 3). Overall, the beech root systems accumulated  $1.5 \pm 0.7\%$   
224 and  $1.2 \pm 0.6\%$  of  $^{15}\text{N}$  from ammonium or from nitrate, respectively (Table 3). Since  
225 assimilation of inorganic nitrogen requires carbon skeletons (51), we measured fine root  
226 non-structural carbohydrate concentrations. However, no significant effects of N  
227 treatment on the carbohydrate concentrations were detected (Table 3).

### 228 **Beech transcriptome responds to nitrate and ammonium treatments**

229 **activating N assimilation.** Mapping of the RNA reads to the beech genome resulted in  
230 a total of 55,408 beech transcript ids or gene models before normalization (Data set 4)  
231 and 27,135 beech gene models after normalization (Data set 5) in DESeq2. Ammonium  
232 and nitrate treatment resulted in 75 and 74 differentially expressed beech gene models  
233 (DEGs), respectively, with both treatments sharing 26 DEGs (Fig. 4A) and indicating  
234 overlapping responses to ammonium and nitrate. Among these overlapping DEGs, a  
235 putative glutamine synthetase (*GS*, AT5G35630.2) showed the highest upregulation,  
236 along with five putative cysteine-rich receptor-like protein kinase orthologs of  
237 *Arabidopsis thaliana* (*CRK8*, AT4G23160.1), outward rectifying potassium channel  
238 protein (*ATKCO1*, AT5G55630.2), HXXXD-type acyl transferase family protein  
239 (*AT5G67150.1*), hemoglobin 1 (*HB1*, AT2G16060.1), molybdate transporter 1 (*MOT1*,  
240 AT2G25680.1), and early nodulin-like protein 20 (*ENODL20*, AT2G27035.1) (Fig. 4B).  
241 Moreover, among the downregulated overlapping DEGs were a cinnamate-4-  
242 hydroxylase (*C4H*, AT2G30490.1) which plays a role in plant phenylpropanoid  
243 metabolism, growth, and development (61), eight orthologs coding for a DNase 1-like

244 superfamily protein (AT1G43760.1), AP2/B3-like transcription factor family proteins  
245 (*VRN1*, AT3G18990.1) which are involved in regulation of the vernalization pathway  
246 (62, 63), subtilase family protein (AT5G45650.1), Ankyrin repeat family protein  
247 (AT3G54070.1), LRR and NB-ARC domains-containing disease resistance protein  
248 (*LRRAC1*, AT3G14460.1) known to play roles in the immune response against  
249 biotrophic fungi and hemibiotrophic bacteria (64), and NB-ARC domain-containing  
250 disease resistance protein (AT4G27190.1) (Fig. 4B).

251 Among unique responses to ammonium treatment were upregulation of a further *GS*  
252 ortholog (AT5G35630.2) and downregulation of a putative nitrate transporter gene  
253 (*NRT1.5*, AT1G32450.1) (Fig. 4B) known to load nitrate into the xylem and to be  
254 induced at high or low nitrate concentration in *A. thaliana* (65). Among the unique DEGs  
255 detected in response to nitrate treatment and known to play roles in nitrate translocation  
256 and metabolism were a putative high affinity nitrate transporter (*NRT3.1*, AT5G50200.1)  
257 which was upregulated along with a putative nitrite transmembrane transporter  
258 (*ATNITR2;1*, AT5G62720.1, see (66), a nitrite reductase 1 (*NIR*, AT2G15620.1), a  
259 molybdate transporter 1 (*MOT1*, AT2G25680.1), a SLAC1 homologue 3 (*SLAH3*,  
260 AT5G24030.1), and chloride channel b (*CLC-B*, AT3G27170.1) genes (Fig. 4B).

261 Furthermore, transcripts for the root-type ferredoxin:NADP(H) oxidoreductase gene  
262 (*RFNR1*, AT4G05390.1) which supplies electrons to Ferredoxin-dependent enzymes  
263 (e.g., Fd-NiR and Fd-GOGAT) (67), and a ferredoxin 3 gene (*FD3*, AT2G27510.1)  
264 which enables electron transfer activity were also upregulated, while a putative nitrate  
265 transporter gene (*NRT1/ PTR FAMILY 6.2*, AT2G26690.1) was down regulated (Fig.  
266 4B). Other genes involved in N assimilation exhibited basal transcript levels, including

267 those coding for the enzymes GOGAT and GDH detected under nitrate, ammonium,  
268 and control conditions but not differentially regulated.

269 Classification of beech DEGs into Mapman bins revealed a significant  
270 overrepresentation of genes involved in “nitrogen metabolism” for both ammonium and  
271 nitrate treatments (Fig. 5). Significantly overrepresented metabolic processes for the  
272 nitrate treatment included “oxidative pentose phosphate pathway (OPP),” “protein,”  
273 “redox,” “secondary metabolism,” “signaling” and “stress” (Fig. 5). For the ammonium  
274 treatment, significantly overrepresented functions included “DNA,” “hormone  
275 metabolism,” “secondary metabolism,” “signaling,” “stress” and “transport” (Fig. 5).  
276 Pathway enrichment analysis of Gene Ontology terms of beech DEGs in g:Profiler  
277 returned significant results for nitrate, but not for ammonium treatment. DEGs from the  
278 nitrate treatment resulted in 38 significantly enriched GO terms involving nitrate-related  
279 molecular level functions and four biological processes including “nitrate  
280 transmembrane transporter activity,” “nitrite reductase activity,” “response to nitrate” and  
281 “nitrate transport” (Table S3). Plant immune responses induced by nitrate were also  
282 evident via the enrichment of a putative isochorismate synthase gene (*ICS2*,  
283 AT1G18870) and a flavin-dependent monooxygenase 1 gene (*FMO1*, AT1G19250).  
284 *ICS2* is involved in the biosynthesis of vitamin K<sub>1</sub> (68) and potentially in salicylic acid  
285 biosynthesis (69, 70). *FMO1* is involved in the catalytic conversion of pipercolic acid to  
286 N-hydroxypipercolic acid (NHP) which plays a role in plant acquired systemic resistance  
287 to infection by pathogens (71).

## 288 **DISCUSSION**

289           **Ectomycorrhizal and root acquisition of nitrate or ammonium.** A central aim  
290 was to gain insights into gene regulation in self-assembled ectomycorrhizas by targeting  
291 the transcriptomes of the fungi living in active symbiosis with beech roots in response to  
292 N provision. To challenge fungal metabolism, we applied N treatments that caused  
293 about 3- and 14-fold increases in the available  $\text{NH}_4^+\text{-N}$  (about  $15.1 \mu\text{g g}^{-1}$  soil DW) and  
294  $\text{NO}_3^-\text{-N}$  (about  $2.3 \mu\text{g g}^{-1}$  soil DW), respectively. The magnitude of these variations was  
295 similar to temporal fluctuations of  $\text{NH}_4^+\text{-N}$  and  $\text{NO}_3^-\text{-N}$  observed in soil of beech stands  
296 with 2-fold and 10-fold changes for  $\text{NH}_4^+\text{-N}$  and  $\text{NO}_3^-\text{-N}$ , respectively (72). Therefore, it  
297 was expected to elicit representative N responses in the naturally assembled EMF  
298 communities. The EMF assemblages in our study showed the typical patterns known for  
299 temperate beech forests with high diversity (21, 23, 24), dominance of certain species  
300 (73, 74) (e.g., genus *Amanita*, *Xerocomus* and *Scleroderma* in this study), and non-  
301 uniform occurrence in the tree roots. However, the two-day N treatments were not  
302 expected to affect the fungal community structure because colonization and  
303 establishment of new ectomycorrhizas takes weeks or months rather than days (75, 76),  
304 and shifts in fungal communities towards more nitrophilic fungi occur as a consequence  
305 of long-term exposure to high N loads (77–81).

306           Our EMF community were composed of taxa characteristic for acidic sandy,  
307 nutrient poor soils, including genera in the orders Agaricales, Boletales, Russulales,  
308 Helotiales, Mytilinidales and Thelephorales (Data set 1). These fungi vary in their  
309 foraging strategies being equipped with different types of hyphae for scavenging N. *C.*  
310 *geophilum* which is the most widespread fungus and known for its tolerance to drought  
311 (82) produces short and medium-distance hyphae, while the hyphae of *Amanita*

312 (medium-distance smooth or long-distance), *Cortinarius* (medium-distance fringe),  
313 *Laccaria* and *Telephora* (medium-distance smooth), *Lactarius* (contact, short and  
314 medium distance), *Russula* (contact), and *Scleroderma* and *Xerocomus* (long-distance)  
315 are also diverse (78, 83). EMF that produce hydrophilic hyphae of contact, short, and  
316 medium-distance smooth exploration types were reported to respond positively or to  
317 display a mixed response to mineral N enrichment, whereas EMF with medium-distance  
318 fringe hydrophobic hyphae are the most sensitive, and those with long-distance  
319 hydrophobic hyphae vary in their responses to mineral N (78).

320 The availability of nitrate and ammonium ions in the soil of this experiment was  
321 made highly dynamic by a sudden increase. The high mobility of the negatively charged  
322 nitrate ions in the soil solution make it more available for the roots than the positively  
323 charged ammonium ions which tend to be fixed by soil colloids, and while both ions are  
324 prone to leaching in sandy soils, ammonium retention by organic matter and clay  
325 minerals is generally higher (5, 13, 14, 84). The lower energy cost needed for  
326 ammonium metabolism make its utilization more advantageous than nitrate. This was  
327 previously observed in EMF (30–35), and in agreement, we found higher translocation  
328 of  $^{15}\text{N}$  from  $\text{NH}_4^+$  than from  $\text{NO}_3^-$  to the coarse roots. Enrichment of the newly applied  
329  $^{15}\text{N}$  in the EMRTs was strong but did not differ between N form applied. We cannot  
330 exclude ammonification by soil microbes potentially converting  $\text{NO}_3^-$  to  $\text{NH}_4^+$  in the soil  
331 before its uptake by the EMF, thus contributing to similar  $^{15}\text{N}$  accumulation patterns in  
332 the ectomycorrhizas after  $\text{NO}_3^-$  or  $\text{NH}_4^+$  application. Microbial turnover rates are  
333 estimated to be about 24 h for ammonium and a few days for nitrate (85). However, the  
334 significant transcriptional regulation of nitrate marker genes in beech roots under nitrate

335 exposure supports that  $\text{NO}_3^-$  was taken up by the root system. In fine root cells,  $\text{NO}_3^-$   
336 was considerably more abundant than  $\text{NH}_4^+$  as observed in beech trees in field  
337 conditions (72, 86) and unaffected by N addition. Our results demonstrate that the newly  
338 acquired  $^{15}\text{N}$  was metabolized because the root N concentrations increased but not the  
339 levels of ammonium or nitrate.

340 ***N assimilation uncovers fungal taxon-specific but not N-induced***  
341 ***transcription patterns in root associated fungal communities.*** Despite the  
342 compelling support for N uptake and assimilation in roots, the EMF metatranscriptome  
343 did not show any significant changes related to N metabolism. Initially, we hypothesized  
344 that if the root-associated fungi and the beech root cells responded like a synchronized  
345 “superorganism,” both fungi and roots would show similar patterns in transcriptional  
346 regulation. However, this hypothesis is rejected because N-responsive DEGs were  
347 found in beech but not in the EMF metatranscriptomes, except for KOG4381 and  
348 KOG4431 which were induced by nitrate. Closer inspection revealed that KOG4381  
349 occurred only in *Thelephora terrestris* and *Russula ochroleuca*, thus not reflecting a  
350 community response and rather suggesting that in the symbiotic system, the host and  
351 EMF partners respond as individual autonomous units. KOG4431 was present in nine  
352 EMF, including *Laccaria amethystina*, *Meliniomyces bicolor*, *Russula ochroleuca*,  
353 *Scleroderma citrinum*, *Thelephora terrestris*, *Xerocomus badius*, *Amanita rubescens*,  
354 *Boletus edulis* and *Cenococcum geophilum*. Further analyses are needed to clarify the  
355 role of these two KOGs in nitrate signaling. Although differentially expressed KOGs  
356 were limited in the fungal metatranscriptomes, putative transporters (NRT/NIT, AMT)  
357 and enzymes (NR, NiR, GS, GOGAT, and GDH) were transcribed (Fig.6), representing



358 all necessary steps for mineral N uptake and assimilation into amino acids. In controlled  
359 laboratory studies, many of these transporters and enzymes have been characterized in  
360 EMF and were regulated by N form and availability. For instance, high affinity  
361 nitrate/nitrite transporters (NRT2), nitrate reductase (NR) and nitrite reductase (NiR1) in  
362 *Hebeloma cylindrosporum* (87, 88), NRT2, NR1 and NiR1 in *Tuber borchii* (89, 90),  
363 NRT, NR and NiR in *L. bicolor* (44, 91), high and low affinity ammonium transporters  
364 (AMT1, AMT2, and AMT3) in *H. cylindrosporum* (50, 92), AMT2 in *Amanita muscaria*  
365 (93), and AMT1, AMT2 and AMT3 in *L. bicolor* (44). Although we did not find N-induced  
366 regulation of specific genes, GO term enrichment analysis shows that functions related  
367 to N assimilation and carbon metabolism were enriched across all studied EMF. We  
368 suggest that at the whole EMF community level, the primary metabolism is genetically  
369 equipped for handling fluctuating environmental N availability and host-derived C  
370 supply.

371 The observed stability of the fungal metatranscriptome was unexpected because  
372 stable isotope labeling and electrophysiological studies showed distinct responsiveness  
373 of different fungal taxa to environmental changes in self-assembled communities (27,  
374 28, 94) and controlled studies (cited above and in the introduction) showed significant  
375 regulation of N-related genes. Our study does not exclude that there were N-induced  
376 responses in distinct fungi, but weak effects might have been masked by the variability  
377 of EMF species occurrence in individual cosms. Presumed species-specific responses  
378 to N fertilization were probably also overridden by inter-specific differences. This can be  
379 inferred from the observation that arrays of N-related genes clustered quite strictly  
380 according to species but not according to the genes with similar functions. Our

381 identification of expression patterns for the fungi under study is an important, novel  
382 result underpinning trait stability within naturally-assembled EMF in beech roots.

383 **Ammonium and nitrate induce specific assimilation patterns in beech**  
384 **roots.** Our initial hypothesis was that EMF shield the plant cells against major  
385 fluctuations in N availabilities and therefore we expected no or moderate changes in the  
386 beech root transcriptome after N fertilization. This hypothesis is rejected since both  
387 ammonium and nitrate treatments caused drastic changes in the beech root  
388 transcriptome. The strategy of European beech for dealing with high loads of inorganic  
389 N availability was transcriptional upregulation of genes involved in N uptake and  
390 assimilation, as observed in *Arabidopsis* (51), a non-mycorrhizal species. The  
391 transcription patterns in response to nitrate and ammonium were clearly distinguishable,  
392 in agreement with other studies that documented nitrate- and ammonium-specific  
393 effects on gene regulation, signaling and lateral root growth (95–100). Notably,  
394 transcripts belonging to putative NRTs and to enzymes (NR, NiR, GS) were significantly  
395 upregulated in the nitrate treatment encompassing the suite of reactions required for  
396 NO<sub>3</sub><sup>-</sup> reduction and incorporation into amino acids (Fig. 6). In addition, upregulation of  
397 root ferredoxin and molybdate transporters pointed to an enhanced need for reducing  
398 power and the biosynthesis of NR, which requires molybdate in its active center (101).  
399 The significant activation of defenses against biotrophic fungi by nitrate was also  
400 remarkable. Similar results were shown in leaves of non-mycorrhizal nitrate-fed trees  
401 (102). In the ammonium treatment, significant upregulation of transcripts levels for two  
402 GS enzymes was detected, while a NRT1.5, potentially loading nitrate into the xylem,  
403 was downregulated. Remarkably, nitrate and ammonium treatments showed a common

404 pattern with strong upregulation of *GS* and *CRK*-like genes (Fig. 4B). CRK receptor  
405 kinases are involved in stress, plant pathogen response and cell death (103, 104). The  
406 *Arabidopsis* ortholog CRK8 is regulated in senescing leaves (105), and while a function  
407 in N metabolism appears likely, controlled experiments are needed. Overall, these  
408 results were in line with the expectation that nitrate-specific, ammonium-specific and  
409 overlapping responses were to be found. We demonstrate for the first time that  
410 excessive N in EMRTs is actively metabolized by the plant. It remains unknown if  $\text{NO}_3^-$   
411 and  $\text{NH}_4^+$  were taken up by EMF and transferred to the plant for further assimilation or if  
412 excessive N circumvented the fungal barrier, entering the plant directly (Fig. 6).

413 In conclusion, effects of high levels of ammonium or nitrate were not evident in  
414 the EMF metatranscriptome, whereas the host tree responded to ammonium and to  
415 nitrate by upregulating genes involved in assimilation of the surplus inorganic N into  
416 organic forms. Although it is unknown whether the applied  $^{15}\text{N}$  sources underwent  
417 conversions due to microbial activities, the response of European beech indicated that a  
418 significant proportion of ammonium and nitrate was taken up in the originally added  
419 form. The fungal transcriptomes suggested species-specific N-metabolic responses,  
420 implying significant trait stability for N turnover and suggesting that EMF in temperate  
421 beech forests are resistant to short-term fluctuations in environmental N. However,  
422 further work is required to investigate to what extent this tolerant capacity can be  
423 sustained and its ecological relevance under chronic N exposure.

## 424 **MATERIALS AND METHODS**

425 **Tree collection, maintenance, and experimental setup.** European beech  
426 (*Fagus sylvatica* L.) saplings were collected on March 7<sup>th</sup>, 2018, in a 122-year-old beech

427 forest (53°07'27.7"N, 10°50'55.7"E, 101 m above sea level, G6hrde, Lower Saxony,  
428 Germany). The soil type is podzolic brown earth with parent material consisting of fluvio-  
429 glacial sands (106). In 2017, the mean annual temperature was 9.9 °C and the total  
430 annual precipitation 768 mm, whereas on the day of tree collection the mean air  
431 temperature was 4.6 °C and the precipitation was 0.66 mm (<https://www.dwd.de>). The  
432 beech saplings (n = 34) were excavated using polyvinyl chloride cylinders (diameter:  
433 0.125 m, depth: 0.2 m), which were placed around a young tree, hammered into the  
434 ground to a depth of 0.2 m, and then carefully lifted to keep the root system in the intact  
435 forest soil. These experimental systems are referred to as cosms. The cosms were  
436 transported to the Forest Botanical Garden, University of Goettingen (51°33'27.1"N  
437 9°57'30.2"E) where they were maintained outdoors under a transparent roof and  
438 exposed to natural climatic conditions except for rain (Table S4). A green shading net  
439 was placed over the roof to protect the trees from direct sun similar as in the forest.  
440 Thereby, on average, the full sun light was reduced on sunny days from 1125  $\mu\text{mol m}^2$   
441  $\text{s}^{-1}$  to 611  $\mu\text{mol m}^{-2} \text{s}^{-1}$  PAR (photosynthetically active radiation) and on cloudy days  
442 from 284  $\mu\text{mol m}^{-2} \text{s}^{-1}$  to 154  $\mu\text{mol m}^{-2} \text{s}^{-1}$  (Quantum/Radiometer/Photometer model  
443 185B, LI-COR Inc., Lincoln, NE, USA). The cosms were regularly watered with  
444 demineralized water. Control of the water quality (flow analyzer, SEAL AutoAnalyzer 3  
445 HR, SEAL Analytical GmbH, Norderstedt, Germany) revealed 0.2 mg  $\text{NH}_4^+ \text{L}^{-1}$  and no  
446 detectable  $\text{NO}_3^-$  in the irrigation water. The cosms were randomly relocated every other  
447 day to avoid confounding positional effects. The trees were grown under these  
448 conditions until July 2018. By this time, the trees had a mean height of  $0.401 \pm 0.08$  m

449 and a root collar diameter of  $6.11 \pm 0.95$  mm. The trees were about 8 ( $\pm 2$ ) years old  
450 based on the number of growth scars along the stem (107). Before the  $^{15}\text{N}$  treatments,  
451 ammonium and nitrate were measured in the soil (details in Text S1). The cosms  
452 contained  $15.1 \pm 11.3 \mu\text{g NH}_4^+\text{-N g}^{-1}$  soil DW and  $2.3 \pm 1.3 \mu\text{g NO}_3^-\text{-N g}^{-1}$  soil DW ( $n = 3$ ,  
453  $\pm\text{SD}$ ), equivalent to approximately 9.1 mg  $\text{NH}_4^+\text{-N}$  and 1.8 mg  $\text{NO}_3^-\text{-N cosm}^{-1}$ .

454 **Application of  $^{15}\text{N}$ -labelled ammonium and nitrate.** Before labeling, even  
455 distribution of irrigation solution in the soil was tested on separate cosms using blue dye  
456 ("GEKO" Lebensmittelfarbe, Wolfram Medenbach, Gotha, Germany) in water. The  
457 experimental cosms were assigned the following treatments: control (no nitrogen  
458 application),  $^{15}\text{NH}_4^+$  application or  $^{15}\text{NO}_3^-$  application. The cosms were surface-irrigated  
459 at 7 am with 60 ml of either 19.85 mM  $^{15}\text{NH}_4\text{Cl}$  (99%  $^{15}\text{N}$ , Cambridge Isotope  
460 Laboratories, Inc., MA, US, pH 5.47) or a 19.98 mM  $^{15}\text{KNO}_3$  (99%  $^{15}\text{N}$ , Cambridge  
461 Isotope Laboratories, pH 6.23) solution prepared in autoclaved deionized water.  
462 Controls were irrigated with 60 ml autoclaved demineralized water (pH 6.07). Each of  
463 these treatments were repeated the next day, resulting in a total application of 35.96 mg  
464  $^{15}\text{N}$  in the nitrate treated cosms or 35.74 mg  $^{15}\text{N}$  in the ammonium treated cosms,  
465 corresponding to mean additions of approximately  $30 \mu\text{g }^{15}\text{N g}^{-1}$  dry soil. Treatments  
466 were conducted in two batches: batch 1:  $^{15}\text{N}$  application on July 17<sup>th</sup>, 2018 and harvest  
467 on July 19<sup>th</sup>, 2018,  $n = 9$  cosms; batch 2:  $^{15}\text{N}$  application on July 31<sup>st</sup>, 2018 and harvest  
468 on August 2<sup>nd</sup>, 2018,  $n = 16$  cosms.

469 **Cosm harvest.** The cosms were harvested 48 h after initial  $^{15}\text{N}$  application. The  
470 tree-soil compartment was pushed out of the cylinder, collecting all parts. Roots were  
471 briefly rinsed with tap water, then with deionized water, and gently surface-dried with

472 paper towels. The root tips were clipped off, shock-frozen in liquid nitrogen, and stored  
473 at -80°C. Aliquots of fine roots were shock-frozen in liquid nitrogen and stored at -80°C  
474 and -20°C and soil aliquots at -20°C. During the harvests, the fresh masses of all  
475 fractions (leaves, stem, coarse roots, fine roots, root tips and soil) were recorded and  
476 aliquots were taken for dry-to-fresh mass determination after drying at 40°C (leaves,  
477 stems, soil) or after freeze-drying (coarse roots, fine roots and root tips). Biomass and  
478 soil mass in the cosms were calculated:

$$479 \quad \text{Total dry mass (g)} = \frac{\text{total fresh weight} \times \text{aliquot dry weight}}{\text{aliquot fresh weight}}$$

480 **Soil and root chemistry.** Soil pH was measured with a WTW pH meter 538  
481 (WTW, Weilheim, Germany) using a ratio of dry sieved soil to water of 1: 2.5 according  
482 to the Forestry Analytics manual (108), A3.1.1.1, page 2. The water content in the soil  
483 was calculated as:

$$484 \quad \text{Relative soil water content (\%)} = \frac{\text{fresh soil weight} - \text{dry soil weight}}{\text{dry soil weight}} \times 100$$

485 For <sup>15</sup>N analyses, freeze-dried aliquots of soil, root tips, fine and coarse roots  
486 were milled using a ball mill (Type MM400, Retsch GmbH, Haan, Germany) in stainless  
487 steel grinding jars at a frequency of 30/sec in 20 second intervals to avoid heating the  
488 sample. The powder (control samples: 1.5 to 2 mg plant tissues, 5 mg soil; labeled  
489 samples: 1.5 to 3 mg plant tissue, 5 to 13 mg soil) was weighed into tin capsules (IVA  
490 Analysentechnik GmbH & Co KG, Meerbusch, Germany) and measured at the KOSI  
491 (Kompetenzzentrum Stabile Isotope, Göttingen, Germany). The <sup>15</sup>N samples were  
492 measured in the isotope mass spectrometer (Delta V Advantage, Thermo Electron,

493 Bremen Germany) and an elemental analyzer (Flash 2000, Thermo Fisher Scientific,  
494 Cambridge, UK) and the non-labeled control samples in a mass spectrometer: Delta  
495 plus, Finnigan MAT, Bremen, Germany and elemental analyzer: NA1110, CE-  
496 Instruments, Rodano, Milano, Italy). Acetanilide (10.36 % N, 71.09 % C, Merck KGaA,  
497 Darmstadt, Germany) was used as the standard. Enrichments of  $^{15}\text{N}$  in the  
498 ectomycorrhizal root tips (EMRTs), fine roots, coarse roots and soil were calculated as:

$$499 \quad ^{15}\text{N enrichment (mg g}^{-1}\text{DW)} = \frac{\text{APE}}{100} \times \text{N concentration of the sample (g g}^{-1}\text{DW)} \times 1000$$

500 where

$$501 \quad \text{APE (atom \% excess)} = \text{atom \% } ^{15}\text{N}_{\text{labelled sample}} - \text{atom \% } ^{15}\text{N}_{\text{non-labeled sample}} \text{ and}$$

$$502 \quad \text{atom \% } ^{15}\text{N} = (^{15}\text{N}) / (^{14}\text{N} + ^{15}\text{N}) \times 100$$

503 For determination of  $\text{NH}_4^+$ ,  $\text{NO}_3^-$  and non-structural carbohydrates, frozen fine  
504 roots ( $-80^\circ\text{C}$ ) were milled (MM400, Retsch GmbH) under liquid nitrogen to avoid  
505 thawing. For mineral N determination, the frozen powder (approximately 55 mg per test)  
506 were extracted as described before (109) with slight modifications and measured  
507 spectrophotometrically with the Spectroquant® (1.09713.0002) Nitrate and Ammonium  
508 (1.14752.0002) Test Kits (Merk, KGaA, Darmstadt, Germany). Glucose, fructose,  
509 sucrose and starch were extracted from approximately 75 mg root powder and were  
510 measured enzymatically as described before (110). Details of all procedures are  
511 reported in (Text S1).

512 **DNA extraction, Illumina sequencing, bioinformatic processing and data**

513 **analyses of fungi.** Root tips (from  $-80^\circ\text{C}$ ) were homogenized in liquid nitrogen using

514 sterilized mortar and pestle. Each powdered, frozen sample was split in two parts: one

515 for DNA extraction and Illumina sequencing of the fungal ITS2 gene and the other for  
516 RNA extraction and mRNA sequencing. DNA was extracted from approximately 200 mg  
517 powder of root tips using the innuPREP Plant DNA Kit (Analytik Jena, AG, Jena,  
518 Germany). Extraction, purification, processing and sequencing are described in detail  
519 (Text S1). Briefly, the fungal nuclear ribosomal DNA internal transcribed spacer (ITS2)  
520 region was amplified by Polymerase Chain Reaction (PCR) using the primer pair  
521 ITS3\_KYO2 (111) and ITS4 (112), both containing specific Illumina overhang adapters  
522 (in italics, primers underlined): forward (Miseq\_ITS3\_KYO2):  
523 *5'-TCGTCGGCAGCGTCAGATGTGTATAAGAGACAGGATGAAGAACGYAGYRAA-3'*;  
524 reverse (Miseq\_ITS4):  
525 *5'-GTCTCGTGGGCTCGGAGATGTGTATAAGAGACAGTCTCCGCTTATTGATATGC-*  
526 *3'*

527 After the PCR, the amplicons were purified and sequenced on a MiSeq flow cell using  
528 Reagent Kit v3 and 2x300 pair-end reads (Illumina Inc., San Diego, USA) according to  
529 the manufacturer's instructions at the Göttingen Genomics Laboratory (G2L, Institute of  
530 Microbiology and Genetics, Georg-August-University Göttingen, Göttingen, Germany).  
531 The raw sequences were quality filtered and clustered according to amplicon sequence  
532 variants (ASVs) at 97% sequence identity (i.e., operation taxonomic units, OTUs).  
533 Fungal reads were mapped to operational taxonomic units (OTUs) and abundance  
534 tables were generated. Taxonomic assignment of OTUs was carried out against the  
535 UNITE database v8.2 (04.02.2020),(113). All unidentified ASVs were searched (blastn)  
536 (114) against the nt database (2020-01-17) to remove non-fungal ASVs. Extrinsic  
537 domain ASVs and unclassified ASVs were discarded from the taxonomic table. The



538 fungal OTUs were assigned to trophic modes using the FUNGuild annotation tool (115).  
539 The sequencing depth per sample was controlled by rarefaction analysis using the  
540 package `ampvis2` (116) and the samples were normalized by rarefying to the sample  
541 with the lowest sequencing depth (i.e. 20,051 sequence reads). An overview of the  
542 sequence processing results is provided in Table S5, and the rarefied abundance table  
543 with taxonomic and guild assignment of OTUs is provided in (Data set 1).

544 **RNA extraction, library preparation, sequencing, and bioinformatic**  
545 **processing of the fungal metatranscriptome and beech transcriptome.** Total RNA  
546 was isolated from the frozen powder of beech root tips using a CTAB method (117). The  
547 details have been reported in (Text S1). RNA integrity numbers (RIN), library  
548 preparation and sequencing were conducted at Chronix Biomedical GmbH (Goettingen,  
549 Germany). Twelve samples with RIN ranging from 6.7 to 7.9 were selected for polyA  
550 mRNA library preparation (Table S6). Libraries were constructed with the NEBNext  
551 RNA Ultra II Library Prep Kit for Illumina (New England Biolabs, Ipswich,  
552 Massachusetts, United States) from 1 µg of purified RNA according to the  
553 manufacturer's instructions. Single-end reads with a length of 75 bp were sequenced on  
554 a NextSeq 500 Sequencing System instrument (Illumina, San Diego, CA, USA) with a  
555 sequencing depth of 100 million reads per sample.

556 Processing (trimming, quality filtering and adapter removal) of the raw sequence  
557 data (ca. 110 million reads per sample) resulted in approximately 109 million reads per  
558 sample (Table S6). The reads were mapped against the reference transcriptomes of  
559 *Fagus sylvatica* and 17 fungal species belonging to the same genera as those detected  
560 by ITS barcoding (Table 1). Reference beech sequences and annotations were

561 downloaded from beechgenome.net (57) and reference fungal sequences and  
562 annotations were downloaded from the JGI MycoCosm database (56). The resulting 18  
563 fasta files were concatenated to one single file, which was used to create an index file  
564 with bowtie2-build (118). The reads were mapped against this index file using bowtie2,  
565 resulting in one count table containing the reads for beech and fungi. On average, 61 %  
566 of the reads could be mapped (45 % to beech and 16 % to fungi) (Table S6). The raw  
567 count table was split into a beech transcriptome count table and fungal transcriptome  
568 count table. Normalization of the raw count tables and differential expression analyses  
569 relative to the control was conducted using the DESeq2 package (119), implemented in  
570 R (120). Differential expression analysis of the fungi was performed at the  
571 metatranscriptome level (i.e., the fungal raw count tables were aggregated by their  
572 EuKaryotic Orthologous Groups of protein identifiers (KOGs, <https://img.jgi.doe.gov/>)),  
573 dropping taxon-specific information for the gene models. Two fungal  
574 metatranscriptomes were considered: the full list fungi metatranscriptome (17 fungi) or  
575 the ectomycorrhizal-specific metatranscriptome (13 fungi). Gene models (European  
576 beech) or KOGs (fungal metatranscriptomes) with a Benjamini-Hochberg adjusted false  
577 discovery rate  $P_{\text{adjusted}} < 0.05$  (121) and at least 2-fold change were considered as  
578 significant differentially expressed gene models (DEGs) or significant KOGs. The  
579 Enzyme Commission numbers assigned to the ectomycorrhizal fungal  
580 metatranscriptome were mapped to the Kyoto Encyclopedia of Genes and Genomes  
581 (KEGG) metabolic pathways against *L. bicolor* in KEGG Mapper (122). Functional  
582 enrichment analysis of fungal expressed genes was carried out in g:Profiler (123)  
583 against KEGG metabolic pathways with *Aspergillus oryzae* as reference since the

584 model ectomycorrhizal fungus *L. bicolor* was not available. Since a main interest in our  
585 experiment was to obtain information on fungal N uptake and metabolism, we manually  
586 searched the complete fungal transcriptional database (Data set 2) for N-related  
587 transporters and enzymes using the key words “nitrate transporter,” “nitrate reductase,”  
588 “nitrite transporter,” “nitrite reductase,” “ammonium transporter”, “glutamine synthetase,”  
589 “glutamate synthase” and “glutamate dehydrogenase.” These terms were searched in  
590 the definition lines accompanying the annotations of each of the fungal transcripts:  
591 “kogdefine” = definition of the KOG identifiers, “ECnumDef” = definition of EC number,  
592 “iprDesc” = description of the InterPro identifiers, and “goName” = description of the  
593 Gene Ontology term. Cluster analyses was done in Clustvis (124). Gene Ontology term  
594 enrichment analysis of beech DEGs was also performed in g:Profiler (123). In addition,  
595 over-representation analysis of biological pathways based on the MapMan bin  
596 classification (Ath\_AGI\_LOCUS\_TAIR10\_Aug2012) of beech DEGs was performed  
597 using the Classification SuperViewer Tool (125) from the Bio-Analytic Resource for  
598 Plant Biology (<http://bar.utoronto.ca/>).

599 **Statistical analyses.** The fungal community data were Hellinger-transformed  
600 and fitted into a non-metric multidimensional scaling (nMDS) ordination based on Bray-  
601 Curtis dissimilarity using the ‘vegan’ package version 2.5-6 (126) and ‘ggplot2’ function  
602 (127) in the R software (128). Permutational analysis of variance (‘adonis 2’) was used  
603 to test if the treatments resulted in significant effects on the fungal community or  
604 transcript composition. Quasi-Poisson regression models were used for over-dispersed  
605 count data (e.g., species richness) and general linear models were applied to normal  
606 distributed data, followed by Tukey’s HSD post-hoc test with the ‘multcomp’ package

607 (129). When necessary, the data was transformed to meet normal distribution. If not  
608 indicated otherwise, data are shown as means ( $\pm$  SD). Linear regression analysis was  
609 conducted in R (128). One cosm from ammonium and one from nitrate treatment were  
610 excluded from the  $^{15}\text{N}$  analyses since the measured  $^{15}\text{N}$  values in soil were higher than  
611 the amount of added  $^{15}\text{N}$ .

612 **Data availability statement.** Raw sequences from the fungal ITS2 gene  
613 metabarcoding-Illumina sequencing are available in the Sequence Read Archive from  
614 the National Center for Biotechnology Information under BioProject accession number  
615 PRJNA736215 (130). Raw read data from RNA seq are also available at the  
616 ArrayExpress database under accession number E-MTAB-8931 (131). Additional  
617 supporting data (Data set 1-6) are accessible in Dryad (132).

## 618 **SUPPLEMENTAL MATERIAL**

619 Table S1, Table S2, Table S3, Table S4, Table S5, Table S6, Figure S1, Text S1

## 620 **SUPPORTING DATA**

621 Data\_set\_1\_rarefied\_fungal\_otu\_table.xlsx

622 Data\_set\_2\_raw\_rna\_counts\_fungi.xlsx

623 Data\_set\_3\_normalized\_rna\_counts\_fungal\_metatranscriptomes.xlsx

624 Data\_set\_4\_raw\_rna\_counts\_fagus.xlsx

625 Data\_set\_5\_normalized\_rna\_counts\_fagus.xlsx

626 Data\_set\_6\_plant\_nutrients\_and\_environmental\_conditions.xlsx

## 627 **ACKNOWLEDGEMENTS**

628 This research was funded by the German Research Foundation (DFG) through the  
629 Research Training Group 2300 “Enrichment of European Beech Forests with Conifers”  
630 (contract number: 316045089, project SP4). We thank the Göhrde State Forest  
631 management office for authorizing tree collection in the forest. CARP is grateful to Dr.  
632 Serena Müller for assistance coordinating field work, to Michael Reichel, Ronny Thoms  
633 and Jonas Glatthorn for help collecting the trees in the forest, and Gaby Lehmann for  
634 help measuring ammonium/nitrate in soil.

635 CARP: Conceptualization, Methodology, Project administration, Investigation,  
636 Formal analysis, Writing – original draft, Writing – review & editing. DJ, DS, RD: Data  
637 curation, Writing – review & editing. AP: Conceptualization, Methodology, Formal  
638 analysis, Supervision, Writing – review & editing.

639 We declare no competing interests.

## 640 REFERENCES

- 641 1. LeBauer DS, Treseder KK. 2008. Nitrogen limitation of net primary productivity in  
642 terrestrial ecosystems is globally distributed. *Ecology* 89:371–379.
- 643 2. Du E, Terrer C, Pellegrini AFA, Ahlström A, van Lissa CJ, Zhao X, Xia N, Wu X,  
644 Jackson RB. 2020. Global patterns of terrestrial nitrogen and phosphorus  
645 limitation. *Nat Geosci* 13:221–226.
- 646 3. JOSHUA P. SCHIMEL AJB. 2004. NITROGEN MINERALIZATION:  
647 CHALLENGES OF A CHANGING PARADIGM. *Ecology* 85:591–602.
- 648 4. Rennenberg H, Dannenmann M, Gessler A, Kreuzwieser J, Simon J, Papen H.  
649 2009. Nitrogen balance in forest soils: Nutritional limitation of plants under climate  
650 change stresses. *Plant Biol* 11:4–23.

- 651 5. Nieder R, Benbi DK, Scherer HW. 2011. Fixation and defixation of ammonium in  
652 soils: A review. *Biol Fertil Soils* 47:1–14.
- 653 6. Rennenberg H, Dannenmann M. 2015. Nitrogen Nutrition of Trees in Temperate  
654 Forests—The Significance of Nitrogen Availability in the Pedosphere and  
655 Atmosphere. *Forests* 6:2820–2835.
- 656 7. Roth M, Michiels HG, Puhlmann H, Sucker C, Winter MB, Hauck M. 2020.  
657 Responses of Temperate Forests to Nitrogen Deposition: Testing the Explanatory  
658 Power of Modeled Deposition Datasets for Vegetation Gradients. *Ecosystems*  
659 <https://doi.org/10.1007/s10021-020-00579-4>.
- 660 8. Vitousek P et al. 1997. HUMAN ALTERATION OF THE GLOBAL NITROGEN  
661 CYCLE: SOURCES AND CONSEQUENCES. *Ecol Appl* 3:737–750.
- 662 9. Erisman JW, van Grinsven H, Grizzetti B, Bouraoui F, Powlson D, Sutton MA,  
663 Bleeker A, Reis S. 2011. The European nitrogen problem in a global perspective.  
664 *Eur Nitrogen Assess* 9–31.
- 665 10. Fowler D, Coyle M, Skiba U, Sutton MA, Cape JN, Reis S, Sheppard LJ, Jenkins  
666 A, Grizzetti B, Galloway JN, Vitousek P, Leach A, Bouwman AF, Butterbach-Bahl  
667 K, Dentener F, Stevenson D, Amann M, Voss M. 2013. The global nitrogen cycle  
668 in the Twentyfirst century. *Philos Trans R Soc B Biol Sci* 368.
- 669 11. Galloway JN, Leach AM, Bleeker A, Erisman JW. 2013. A chronology of human  
670 understanding of the nitrogen cycle. *Philos Trans R Soc B Biol Sci* 368.
- 671 12. Fleck S, Eickenscheidt N, Ahrends B, Evers J, Grüneberg E, Ziche D, Höhle J,  
672 Schmitz A, Weis W, Schmidt-Walter P, Andreae H, Wellbrock N. 2019. Nitrogen  
673 Status and Dynamics in German Forest Soils, p. 123–166. *In* . Cham.

- 674 13. Kadyampakeni DM, Nkedi-Kizza P, Leiva JA, Muwamba A, Fletcher E, Morgan  
675 KT. 2018. Ammonium and nitrate transport during saturated and unsaturated  
676 water flow through sandy soils. *J Plant Nutr Soil Sci* 181:198–210.
- 677 14. Brady NC, Weil RR. 1999. Nitrogen and Sulfure Economy of Soils, p. 491–539. *In*  
678 *The Nature and Properties of Soils* 12th ed. Prentice-Hall, Inc., New Jersey.
- 679 15. Read DJ, Perez-Moreno J. 2003. Mycorrhizas and nutrient cycling in ecosystems  
680 - A journey towards relevance? *New Phytol* 157:475–492.
- 681 16. Hobbie JE, Hobbie EA. 2006. 15N in symbiotic fungi and plants estimates  
682 nitrogen and carbon flux rates in arctic tundra. *Ecology* 87:816–822.
- 683 17. Hobbie EA, Hobbie JE. 2008. Natural Abundance of 15N in Nitrogen-Limited  
684 Forests and Tundra Can Estimate Nitrogen Cycling Through Mycorrhizal Fungi: A  
685 Review. *Ecosystems* 11:815–830.
- 686 18. Rineau F, Roth D, Shah F, Smits M, Johansson T, Canbäck B, Olsen PB,  
687 Persson P, Grell MN, Lindquist E, Grigoriev I V., Lange L, Tunlid A. 2012. The  
688 ectomycorrhizal fungus *Paxillus involutus* converts organic matter in plant litter  
689 using a trimmed brown-rot mechanism involving Fenton chemistry. *Environ*  
690 *Microbiol* 14:1477–1487.
- 691 19. van der Heijden MGA, Martin FM, Selosse M-A, Sanders IR. 2015. Mycorrhizal  
692 ecology and evolution: the past, the present, and the future. *New Phytol*  
693 205:1406–1423.
- 694 20. Op De Beeck M, Troein C, Peterson C, Persson P, Tunlid A. 2018. Fenton  
695 reaction facilitates organic nitrogen acquisition by an ectomycorrhizal fungus. *New*  
696 *Phytol* 218:335–343.

- 697 21. Buée M, Vairelles D, Garbaye J. 2005. Year-round monitoring of diversity and  
698 potential metabolic activity of the ectomycorrhizal community in a beech (*Fagus*  
699 *silvatica*) forest subjected to two thinning regimes. *Mycorrhiza* 15:235–245.
- 700 22. Pena R, Offermann C, Simon J, Naumann PS, Geßler A, Holst J, Dannenmann  
701 M, Mayer H, Kegel-Knabner I, Rennenberg H, Polle A. 2010. Girdling affects  
702 ectomycorrhizal fungal (EMF) diversity and reveals functional differences in EMF  
703 community composition in a beech forest. *Appl Environ Microbiol* 76:1831–1841.
- 704 23. Lang C, Polle A. 2011. Ectomycorrhizal fungal diversity, tree diversity and root  
705 nutrient relations in a mixed Central European forest. *Tree Physiol* 31:531–538.
- 706 24. Schröter K, Wemheuer B, Pena R, Schöning I, Ehbrecht M, Schall P, Ammer C,  
707 Daniel R, Polle A. 2019. Assembly processes of trophic guilds in the root  
708 mycobiome of temperate forests. *Mol Ecol* 28:348–364.
- 709 25. Melin E, Nilsson H. 1957. Transport of C<sup>14</sup>-labelled Photosynthate to the Fungal  
710 Associate of Pine Mycorrhiza. *Sven Bot Tidskr* 51:166–186.
- 711 26. Melin E, Nilsson H. 1952. Transport of labelled nitrogen from an ammonium  
712 source to pine seedlings through mycorrhizal mycelium. *Sven Bot Tidskr* 46:281–  
713 285.
- 714 27. Pena R, Polle A. 2014. Attributing functions to ectomycorrhizal fungal identities in  
715 assemblages for nitrogen acquisition under stress. *ISME J* 8:321–330.
- 716 28. Pena R, Tejedor J, Zeller B, Dannenmann M, Polle A. 2013. Interspecific temporal  
717 and spatial differences in the acquisition of litter-derived nitrogen by  
718 ectomycorrhizal fungal assemblages. *New Phytol* 199:520–528.
- 719 29. FINLAY RD, EK H, ODHAM G, SÖDERSTRÖM B. 1988. Mycelial uptake,



- 720 translocation and assimilation of nitrogen from  $^{15}\text{N}$ -labelled ammonium by *Pinus*  
721 *sylvestris* plants infected with four different ectomycorrhizal fungi. *New Phytol*  
722 110:59–66.
- 723 30. FINLAY RD, EK H, ODHAM G, SÜDERSTRÖM B. 1989. Uptake, translocation  
724 and assimilation of nitrogen from  $^{15}\text{N}$ -labelled ammonium and nitrate sources by  
725 intact ectomycorrhizal systems of *Fagus sylvatica* infected with *Paxillus involutus*.  
726 *New Phytol* 113:47–55.
- 727 31. EK H, ANDERSSON S, ARNEBRANT K, SÖDERSTRÖM B. 1994. Growth and  
728 assimilation of  $\text{NH}_4^+$  and  $\text{NO}_3^-$  by *Paxillus involutus* in association with *Betula*  
729 *pendula* and *Picea abies* as affected by substrate pH. *New Phytol* 128:629–637.
- 730 32. Dannenmann M, Bimüller C, Gschwendtner S, Leberecht M, Tejedor J, Bilela S,  
731 Gasche R, Hanewinkel M, Baltensweiler A, Kögel-Knabner I, Polle A, Schloter M,  
732 Simon J, Rennenberg H. 2016. Climate change impairs nitrogen cycling in  
733 european beech forests. *PLoS One* 11:1–24.
- 734 33. Leberecht M, Dannenmann M, Tejedor J, Simon J, Rennenberg H, Polle A. 2016.  
735 Segregation of nitrogen use between ammonium and nitrate of ectomycorrhizas  
736 and beech trees. *Plant Cell Environ* 39:2691–2700.
- 737 34. FINLAY RD, FROSTEGÅRD, SONNERFELDT A -M. 1992. Utilization of organic  
738 and inorganic nitrogen sources by ectomycorrhizal fungi in pure culture and in  
739 symbiosis with *Pinus contorta* Dougl. ex Loud. *New Phytol* 120:105–115.
- 740 35. Nygren CMR, Eberhardt U, Karlsson M, Parrent JL, Lindahl BD, Taylor AFS.  
741 2008. Growth on nitrate and occurrence of nitrate reductase-encoding genes in a  
742 phylogenetically diverse range of ectomycorrhizal fungi. *New Phytol* 180:875–889.

- 743 36. Kemppainen M, Duplessis S, Martin F, Pardo AG. 2009. RNA silencing in the  
744 model mycorrhizal fungus *Laccaria bicolor*: gene knock-down of nitrate reductase  
745 results in inhibition of symbiosis with *Populus*. *Environ Microbiol* 11:1878–1896.
- 746 37. Chalot M, Blaudez D, Brun A. 2006. Ammonia: a candidate for nitrogen transfer at  
747 the mycorrhizal interface. *Trends Plant Sci*.
- 748 38. Casieri L, Ait Lahmidi N, Doïdy J, Veneault-Fourrey C, Migeon A, Bonneau L,  
749 Courty PE, Garcia K, Charbonnier M, Delteil A, Brun A, Zimmermann S, Plassard  
750 C, Wipf D. 2013. Biotrophic transportome in mutualistic plant-fungal interactions.  
751 *Mycorrhiza* 23:597–625.
- 752 39. Garcia K, Doïdy J, Zimmermann SD, Wipf D, Courty PE. 2016. Take a Trip  
753 Through the Plant and Fungal Transportome of Mycorrhiza. *Trends Plant Sci*  
754 21:937–950.
- 755 40. Nehls U, Plassard C. 2018. Nitrogen and phosphate metabolism in  
756 ectomycorrhizas. *New Phytol* 1047–1058.
- 757 41. Becquer A, Guerrero-Galán C, Eibensteiner JL, Houdinet G, Bücking H,  
758 Zimmermann SD, Garcia K. 2019. The ectomycorrhizal contribution to tree  
759 nutrition. *Adv Bot Res* 89:77–126.
- 760 42. Stuart EK, Plett KL. 2020. Digging Deeper: In Search of the Mechanisms of  
761 Carbon and Nitrogen Exchange in Ectomycorrhizal Symbioses. *Front Plant Sci*.  
762 Frontiers Media S.A.
- 763 43. Selle A, Willmann M, Grunze N, Geßler A, Weiß M, Nehls U. 2005. The high-  
764 affinity poplar ammonium importer PttAMT1.2 and its role in ectomycorrhizal  
765 symbiosis. *New Phytol* 168:697–706.

- 766 44. Lucic E, Fourrey C, Kohler A, Martin F, Chalot M, Brun-Jacob A. 2008. A gene  
767 repertoire for nitrogen transporters in *Laccaria bicolor*. *New Phytol* 180:343–364.
- 768 45. Dietz S, von Bülow J, Beitz E, Nehls U. 2011. The aquaporin gene family of the  
769 ectomycorrhizal fungus *Laccaria bicolor*: Lessons for symbiotic functions. *New*  
770 *Phytol* 190:927–940.
- 771 46. Hacquard S, Tisserant E, Brun A, Legué V, Martin F, Kohler A. 2013. Laser  
772 microdissection and microarray analysis of *Tuber melanosporum* ectomycorrhizas  
773 reveal functional heterogeneity between mantle and Hartig net compartments.  
774 *Environ Microbiol* 15:1853–1869.
- 775 47. Müller T, Avolio M, Olivi M, Benjdia M, Rikirsch E, Kasaras A, Fitz M, Chalot M,  
776 Wipf D. 2007. Nitrogen transport in the ectomycorrhiza association: The  
777 *Hebeloma cylindrosporum*-*Pinus pinaster* model. *Phytochemistry* 68:41–51.
- 778 48. Willmann A, Thomföhrde S, Haensch R, Nehls U. 2014. The poplar NRT2 gene  
779 family of high affinity nitrate importers: Impact of nitrogen nutrition and  
780 ectomycorrhiza formation. *Environ Exp Bot* 108:79–88.
- 781 49. Sa G, Yao J, Deng C, Liu J, Zhang Y, Zhu Z, Zhang Y, Ma X, Zhao R, Lin S, Lu  
782 C, Polle A, Chen S. 2019. Amelioration of nitrate uptake under salt stress by  
783 ectomycorrhiza with and without a Hartig net. *New Phytol* 222:1951–1964.
- 784 50. Javelle A, Morel M, Rodríguez-Pastrana BR, Botton B, André B, Marini AM, Brun  
785 A, Chalot M. 2003. Molecular characterization, function and regulation of  
786 ammonium transporters (Amt) and ammonium-metabolizing enzymes (GS,  
787 NADP-GDH) in the ectomycorrhizal fungus *Hebeloma cylindrosporum*. *Mol*  
788 *Microbiol* 47:411–430.

- 789 51. A. Lal M. 2018. Nitrogen Metabolism, p. 425–480. *In* Plant Physiology,  
790 Development and Metabolism. Springer Singapore, Singapore.
- 791 52. MARTIN F, CÔTÉ R, CANET D. 1994. NH<sub>4</sub><sup>+</sup> assimilation in the ectomycorrhizal  
792 basidiomycete *Laccaria bicolor* (Maire) Orton, a <sup>15</sup>N-NMR study. *New Phytol*  
793 128:479–485.
- 794 53. Vallorani L, Polidori E, Sacconi C, Agostini D, Pierleoni R, Piccoli G, Zeppa S,  
795 Stocchi V. 2002. Biochemical and molecular characterization of NADP-glutamate  
796 dehydrogenase from the ectomycorrhizal fungus *Tuber borchii*. *New Phytol*  
797 154:779–790.
- 798 54. Morel M, Buée M, Chalot M, Brun A. 2006. NADP-dependent glutamate  
799 dehydrogenase: A dispensable function in ectomycorrhizal fungi. *New Phytol*  
800 169:179–190.
- 801 55. Grzechowiak M, Sliwiak J, Jaskolski M, Ruszkowski M. 2020. Structural Studies  
802 of Glutamate Dehydrogenase (Isoform 1) From *Arabidopsis thaliana*, an Important  
803 Enzyme at the Branch-Point Between Carbon and Nitrogen Metabolism. *Front*  
804 *Plant Sci* 11:1–17.
- 805 56. Grigoriev I V., Nikitin R, Haridas S, Kuo A, Ohm R, Otilar R, Riley R, Salamov A,  
806 Zhao X, Korzeniewski F, Smirnova T, Nordberg H, Dubchak I, Shabalov I. 2014.  
807 MycoCosm portal: Gearing up for 1000 fungal genomes. *Nucleic Acids Res*  
808 42:699–704.
- 809 57. Mishra B, Gupta DK, Pfenninger M, Hickler T, Langer E, Nam B, Paule J, Sharma  
810 R, Ulaszewski B, Warmbier J, Burczyk J, Thines M. 2018. A reference genome of  
811 the European beech (*Fagus sylvatica* L.). *Gigascience* 7.

- 812 58. Meessenburg H, Ahrends B, Fleck S, Wagner M, Fortmann H, Scheler B, Klinck U,  
813 Dammann I, Eichhorn J, Mindrup M, Meiwes KJ. 2016. Long-term changes of  
814 ecosystem services at Solling, Germany: Recovery from acidification, but  
815 increasing nitrogen saturation? *Ecol Indic* 65:103–112.
- 816 59. de Vries W, Du E, Butterbach-Bahl K. 2014. Short and long-term impacts of  
817 nitrogen deposition on carbon sequestration by forest ecosystems. *Curr Opin*  
818 *Environ Sustain* 9–10:90–104.
- 819 60. Green ML, Karp PD. 2005. Genome annotation errors in pathway databases due  
820 to semantic ambiguity in partial EC numbers. *Nucleic Acids Res* 33:4035–4039.
- 821 61. Schillmiller AL, Stout J, Weng JK, Humphreys J, Ruegger MO, Chapple C. 2009.  
822 Mutations in the cinnamate 4-hydroxylase gene impact metabolism, growth and  
823 development in *Arabidopsis*. *Plant J* 60:771–782.
- 824 62. Chandler J, Wilson A, Dean C. 1996. *Arabidopsis* mutants showing an altered  
825 response to vernalization. *Plant J* 10:637–644.
- 826 63. Peng FY, Weselake RJ. 2013. Genome-wide identification and analysis of the B3  
827 superfamily of transcription factors in Brassicaceae and major crop plants. *Theor*  
828 *Appl Genet* 126:1305–1319.
- 829 64. Bianchet C, Wong A, Quaglia M, Alqurashi M, Gehring C, Ntoukakis V, Pasqualini  
830 S. 2019. An *Arabidopsis thaliana* leucine-rich repeat protein harbors an adenylyl  
831 cyclase catalytic center and affects responses to pathogens. *J Plant Physiol*  
832 232:12–22.
- 833 65. Lin SH, Kuo HF, Canivenc G, Lin CS, Lepetit M, Hsu PK, Tillard P, Lin HG, Wang  
834 YY, Tsai CB, Gojon A, Tsay YF. 2008. Mutation of the *Arabidopsis* NRT1.5 nitrate

- 835 transporter causes defective root-to-shoot nitrate transport. *Plant Cell* 20:2514–  
836 2528.
- 837 66. Maeda SI, Konishi M, Yanagisawa S, Omata T. 2014. Nitrite transport activity of a  
838 novel HPP family protein conserved in cyanobacteria and chloroplasts. *Plant Cell*  
839 *Physiol* 55:1311–1324.
- 840 67. Hachiya T, Ueda N, Kitagawa M, Hanke G, Suzuki A, Hase T, Sakakibara H.  
841 2016. Arabidopsis root-type ferredoxin: NADP(H) oxidoreductase 2 is involved in  
842 detoxification of nitrite in roots. *Plant Cell Physiol* 57:2440–2450.
- 843 68. Gross J, Won KC, Lezhneva L, Falk J, Krupinska K, Shinozaki K, Seki M,  
844 Herrmann RG, Meurer J. 2006. A plant locus essential for phyloquinone (vitamin  
845 K1) biosynthesis originated from a fusion of four eubacterial genes. *J Biol Chem*  
846 281:17189–17196.
- 847 69. Wildermuth MC, Dewdney J, Wu G, Ausubel FM. 2002. Erratum: corrigendum:  
848 Isochorismate synthase is required to synthesize salicylic acid for plant defence.  
849 *Nature* 417:571–571.
- 850 70. Garcion C, Lohmann A, Lamodièrre E, Catinot J, Buchala A, Doermann P,  
851 Métraux JP. 2008. Characterization and biological function of the Isochorismate  
852 Synthase2 gene of Arabidopsis. *Plant Physiol* 147:1279–1287.
- 853 71. Hartmann M, Zeier J. 2018. l-lysine metabolism to N-hydroxypipicolinic acid: an  
854 integral immune-activating pathway in plants. *Plant J* 96:5–21.
- 855 72. Dannenmann M, Simon J, Gasche R, Holst J, Naumann PS, Kögel-Knabner I,  
856 Knicker H, Mayer H, Schloter M, Pena R, Polle A, Rennenberg H, Papen H. 2009.  
857 Tree girdling provides insight on the role of labile carbon in nitrogen partitioning

- 858 between soil microorganisms and adult European beech. *Soil Biol Biochem*  
859 41:1622–1631.
- 860 73. Unuk T, Martinović T, Finžgar D, Šibanc N, Grebenc T, Kraigher H. 2019. Root-  
861 associated fungal communities from two phenologically contrasting silver fir  
862 (*Abies alba* mill.) groups of trees. *Front Plant Sci* 10:1–11.
- 863 74. Mrak T, Hukić E, Štraus I, Unuk Nahberger T, Kraigher H. 2020. Ectomycorrhizal  
864 community composition of organic and mineral soil horizons in silver fir (*Abies*  
865 *alba* Mill.) stands. *Mycorrhiza* 30:541–553.
- 866 75. Lilleskov EA, Bruns TD. 2003. Root colonization dynamics of two ectomycorrhizal  
867 fungi of contrasting life history strategies are mediated by addition of organic  
868 nutrient patches. *New Phytol* 159:141–151.
- 869 76. Malajczuk N, Lapeyrie F, Garbaye J. 1990. Infectivity of pine and eucalypt isolates  
870 of *Pisolithus tinctorius* (Pers.) Coker & Couch on roots of *Eucalyptus*  
871 *urophylla* S. T. Blake in vitro. II. Ultrastructural and biochemical changes at the  
872 early stage of mycorrhiza formation. *New Phytol* 116:115–122.
- 873 77. Treseder KK. 2004. A meta-analysis of mycorrhizal responses to nitrogen,  
874 phosphorus, and atmospheric CO<sub>2</sub> in field studies. *New Phytol* 164:347–355.
- 875 78. Lilleskov EA, Hobbie EA, Horton TR. 2011. Conservation of ectomycorrhizal fungi:  
876 Exploring the linkages between functional and taxonomic responses to  
877 anthropogenic N deposition. *Fungal Ecol* 4:174–183.
- 878 79. Cox F, Barsoum N, Lilleskov EA, Bidartondo MI. 2010. Nitrogen availability is a  
879 primary determinant of conifer mycorrhizas across complex environmental  
880 gradients. *Ecol Lett* 13:1103–1113.

- 881 80. de Witte LC, Rosenstock NP, van der Linde S, Braun S. 2017. Nitrogen  
882 deposition changes ectomycorrhizal communities in Swiss beech forests. *Sci*  
883 *Total Environ* 605–606:1083–1096.
- 884 81. van der Linde S, Suz LM, Orme CDL, Cox F, Andreae H, Asi E, Atkinson B,  
885 Benham S, Carroll C, Cools N, De Vos B, Dietrich H-P, Eichhorn J, Gehrman J,  
886 Grebenc T, Gweon HS, Hansen K, Jacob F, Kristofel F, Lech P, Manninger M,  
887 Martin J, Meesenburg H, Merila P, Nicolas M, Pavlenda P, Rautio P, Schaub M,  
888 Schrock H-W, Seidling W, Šramek V, Thimonier A, Thomsen IM, Titeux H,  
889 Vanguelova E, Verstraeten A, Vesterdal L, Waldner P, Wijk S, Zhang Y, Žlindra  
890 D, Bidartondo MI. 2018. Author Correction: Environment and host as large-scale  
891 controls of ectomycorrhizal fungi. *Nature* 561:E42–E42.
- 892 82. Peter M, Kohler A, Ohm RA, Kuo A, Krützmann J, Morin E, Arend M, Barry KW,  
893 Binder M, Choi C, Clum A, Copeland A, Grisel N, Haridas S, Kipfer T, Labutti K,  
894 Lindquist E, Lipzen A, Maire R, Meier B, Mihaltcheva S, Molinier V, Murat C,  
895 Pöggeler S, Quandt CA, Sperisen C, Tritt A, Tisserant E, Crous PW, Henrissat B,  
896 Nehls U, Egli S, Spatafora JW, Grigoriev I V., Martin FM. 2016. Ectomycorrhizal  
897 ecology is imprinted in the genome of the dominant symbiotic fungus  
898 *Cenococcum geophilum*. *Nat Commun* 7.
- 899 83. Trocha LK, Bułaj B, Durska A, Frankowski M, Mucha J. 2021. Not all long-  
900 distance-exploration types of ectomycorrhizae are the same: Differential  
901 accumulation of nitrogen and carbon in scleroderma and *Xerocomus* in response  
902 to variations in soil fertility. *IForest* 14:48–52.
- 903 84. Kothawala DN, Moore TR. 2009. Adsorption of dissolved nitrogen by forest



- 904 mineral soils. *Can J For Res* 39:2381–2390.
- 905 85. Clark DR, McKew BA, Dong LF, Leung G, Dumbrell AJ, Stott A, Grant H, Nedwell  
906 DB, Trimmer M, Whitby C. 2020. Mineralization and nitrification: Archaea  
907 dominate ammonia-oxidising communities in grassland soils. *Soil Biol Biochem*  
908 143:107725.
- 909 86. Li X, Rennenberg H, Simon J. 2016. Seasonal variation in N uptake strategies in  
910 the understorey of a beech-dominated N-limited forest ecosystem depends on N  
911 source and species. *Tree Physiol* 36:589–600.
- 912 87. Jargeat P, Gay G, Debaud JC, Marmeisse R. 2000. Transcription of a nitrate  
913 reductase gene isolated from the symbiotic basidiomycete fungus *Hebeloma*  
914 *cylindrosporum* does not require induction by nitrate. *Mol Gen Genet* 263:948–  
915 956.
- 916 88. Jargeat P, Rekangalt D, Verner MC, Gay G, Debaud JC, Marmeisse R,  
917 Fraissinet-Tachet L. 2003. Characterisation and expression analysis of a nitrate  
918 transporter and nitrite reductase genes, two members of a gene cluster for nitrate  
919 assimilation from the symbiotic basidiomycete *Hebeloma cylindrosporum*. *Curr*  
920 *Genet* 43:199–205.
- 921 89. Montanini B, Viscomi AR, Bolchi A, Martin Y, Siverio JM, Balestrini R, Bonfante P,  
922 Ottonello S. 2006. Functional properties and differential mode of regulation of the  
923 nitrate transporter from a plant symbiotic ascomycete. *Biochem J* 394:125–134.
- 924 90. Guescini M, Zeppa S, Pierleoni R, Sisti D, Stocchi L, Stocchi V. 2007. The  
925 expression profile of the *Tuber borchii* nitrite reductase suggests its positive  
926 contribution to host plant nitrogen nutrition. *Curr Genet* 51:31–41.

- 927 91. Kemppainen MJ, Alvarez Crespo MC, Pardo AG. 2010. fHANT-AC genes of the  
928 ectomycorrhizal fungus *Laccaria bicolor* are not repressed by L-glutamine  
929 allowing simultaneous utilization of nitrate and organic nitrogen sources. *Environ*  
930 *Microbiol Rep* 2:541–553.
- 931 92. Javelle A, Rodríguez-Pastrana BR, Jacob C, Botton B, Brun A, André B, Marini  
932 AM, Chalot M. 2001. Molecular characterization of two ammonium transporters  
933 from the ectomycorrhizal fungus *Hebeloma cylindrosporum*. *FEBS Lett* 505:393–  
934 398.
- 935 93. Willmann A, Weiß M, Nehls U. 2007. Ectomycorrhiza-mediated repression of the  
936 high-affinity ammonium importer gene *AmAMT2* in *Amanita muscaria*. *Curr Genet*  
937 51:71–78.
- 938 94. Kranabetter JM, Hawkins BJ, Jones MD, Robbins S, Dyer T, Li T. 2015. Species  
939 turnover (??-diversity) in ectomycorrhizal fungi linked to NH<sub>4</sub><sup>+</sup> uptake capacity.  
940 *Mol Ecol* 24:5992–6005.
- 941 95. Patterson K, Cakmak T, Cooper A, Lager I, Rasmusson AG, Escobar MA. 2010.  
942 Distinct signalling pathways and transcriptome response signatures differentiate  
943 ammonium- and nitrate-supplied plants. *Plant, Cell Environ* 33:1486–1501.
- 944 96. Lima JE, Kojima S, Takahashi H, von Wirén N. 2010. Ammonium triggers lateral  
945 root branching in *Arabidopsis* in an AMMONIUM TRANSPORTER1;3-dependent  
946 manner. *Plant Cell* 22:3621–3633.
- 947 97. Xu N, Wang R, Zhao L, Zhang C, Li Z, Lei Z, Liu F, Guan P, Chu Z, Crawford NM.  
948 2015. The *Arabidopsis* NRG2 protein mediates nitrate signaling and interacts with  
949 and regulates key nitrate regulators. *Plant Cell* 28:485–504.

- 950 98. O'Brien JAA, Vega A, Bouguyon E, Krouk G, Gojon A, Coruzzi G, Gutiérrez RAA.  
951 2016. Nitrate Transport, Sensing, and Responses in Plants. *Mol Plant* 9:837–856.
- 952 99. Hachiya T, Sakakibara H. 2017. Interactions between nitrate and ammonium in  
953 their uptake, allocation, assimilation, and signaling in plants. *J Exp Bot* 68:2501–  
954 2512.
- 955 100. Asim M, Ullah Z, Xu F, An L, Aluko OO, Wang Q, Liu H. 2020. Nitrate Signaling,  
956 Functions, and Regulation of Root System Architecture: Insights from *Arabidopsis*  
957 *thaliana*. *Genes (Basel)* 11:633.
- 958 101. Schwarz G, Mendel RR. 2006. Molybdenum cofactor biosynthesis and  
959 molybdenum enzymes. *Annu Rev Plant Biol* 57:623–647.
- 960 102. Kasper K, Abreu IN, Freussner K, Zienkiewicz K, Herrfurth C, Ischebeck T, Janz  
961 D, Majcherczyk An, Schmitt K, Valerius O, Braus GH, Feussner I, Polle A. 2021.  
962 Multi-omics analysis of xylem sap uncovers dynamic modulation of poplar  
963 defenses by ammonium and nitrate *bioRxiv*.
- 964 103. Chen K, Fan B, Du L, Chen Z. 2004. Activation of hypersensitive cell death by  
965 pathogen-induced receptor-like protein kinases from *Arabidopsis*. *Plant Mol Biol*  
966 56:271–283.
- 967 104. Quezada EH, García GX, Arthikala MK, Melappa G, Lara M, Nanjareddy K. 2019.  
968 Cysteine-rich receptor-like kinase gene family identification in the phaseolus  
969 genome and comparative analysis of their expression profiles specific to  
970 mycorrhizal and rhizobial symbiosis. *Genes (Basel)* 10.
- 971 105. Klepikova A V., Kasianov AS, Gerasimov ES, Logacheva MD, Penin AA. 2016. A  
972 high resolution map of the *Arabidopsis thaliana* developmental transcriptome

- 973 based on RNA-seq profiling. *Plant J* 88:1058–1070.
- 974 106. Boess J, Gehrt E, Müller U, Ostmann U, Sbresny J, Steininger A. 2004.  
975 Erläuterungsheft zur digitalen nutzungsdifferenzierten Bodenkundlichen  
976 Übersichtskarte 1:50.000 (BÜK50n) von Niedersachsen. Schweizerbart Science  
977 Publishers, Stuttgart, Germany.
- 978 107. Roloff A. 1988. Morphologie der Kronenentwicklung von *Fagus sylvatica* L.  
979 (Rotbuche) unter besonderer Berücksichtigung neuartiger Veränderungen: II.  
980 Strategie der Luftraumeroberung und Veränderungen durch Umwelteinflüsse.  
981 *Flora* 180:297–338.
- 982 108. König N. 2014. Handbuch Forstliche Analytik: Eine Loseblatt-Sammlung der  
983 Analysemethoden im Forstbereich.
- 984 109. Hachiya T, Okamoto Y. 2017. Simple Spectroscopic Determination of Nitrate,  
985 Nitrite, and Ammonium in *Arabidopsis thaliana*. *BIO-PROTOCOL* 7.
- 986 110. Schopfer P. 1989. Qualitative und quantitative Analyse von Pflanzenmaterial, p.  
987 1–51. *In* Experimentelle Pflanzenphysiologie. Springer Berlin Heidelberg, Berlin,  
988 Heidelberg.
- 989 111. Toju H, Tanabe AS, Yamamoto S, Sato H. 2012. High-coverage ITS primers for  
990 the DNA-based identification of ascomycetes and basidiomycetes in  
991 environmental samples. *PLoS One* 7.
- 992 112. White TJ, Bruns T, Lee S, Taylor J. 1990. AMPLIFICATION AND DIRECT  
993 SEQUENCING OF FUNGAL RIBOSOMAL RNA GENES FOR  
994 PHYLOGENETICS, p. 315–322. *In* Innis, MA, Gelfand, DH, Sninsky, JJ, White,  
995 TJ (eds.), *PCR Protocols*. Elsevier, San Diego.

- 996 113. Abarenkov K, Zirk A, Piirmann T, Pöhönen R, Ivanov F, Nilsson RH, Kõljalg U.  
997 2020. Full UNITE+INSD dataset for Fungi. UNITE Community.
- 998 114. Altschul SF, Gish W, Miller W, Myers EW, Lipman DJ. 1990. Basic local alignment  
999 search tool. *J Mol Biol* 215:403–410.
- 1000 115. Nguyen NH, Song Z, Bates ST, Branco S, Tedersoo L, Menke J, Schilling JS,  
1001 Kennedy PG. 2016. FUNGuild: An open annotation tool for parsing fungal  
1002 community datasets by ecological guild. *Fungal Ecol* 20:241–248.
- 1003 116. Andersen K, Kirkegaard R, Karst S, Albertsen M. 2018. ampvis2: an R package to  
1004 analyse and visualise 16S rRNA amplicon data. *bioRxiv* 299537.
- 1005 117. Chang S, Puryear J, Cairney J. 1993. A simple and efficient method for isolating  
1006 RNA from pine trees. *Plant Mol Biol Report* 11:113–116.
- 1007 118. Langmead B, Salzberg SL. 2012. Fast gapped-read alignment with Bowtie 2. *Nat*  
1008 *Methods* 9:357–359.
- 1009 119. Love MI, Huber W, Anders S. 2014. Moderated estimation of fold change and  
1010 dispersion for RNA-seq data with DESeq2. *Genome Biol* 15:1–21.
- 1011 120. R Core Team. 2018. R: A language and environment for statistical computing. R  
1012 Foundation for Statistical Computing, Vienna, Austria.
- 1013 121. Benjamini Y, Hochberg Y. 1995. Controlling the False Discovery Rate : A Practical  
1014 and Powerful Approach to Multiple Testing. *R Stat Soc* 57:289–300.
- 1015 122. Kanehisa M, Sato Y. 2020. KEGG Mapper for inferring cellular functions from  
1016 protein sequences. *Protein Sci* 29:28–35.
- 1017 123. Raudvere U, Kolberg L, Kuzmin I, Arak T, Adler P, Peterson H, Vilo J. 2019.  
1018 G:Profiler: A web server for functional enrichment analysis and conversions of

- 1019 gene lists (2019 update). *Nucleic Acids Res* 47:W191–W198.
- 1020 124. Metsalu T, Vilo J. 2015. ClustVis: A web tool for visualizing clustering of  
1021 multivariate data using Principal Component Analysis and heatmap. *Nucleic Acids*  
1022 *Res* 43:W566–W570.
- 1023 125. Provart N, Zhu T. 2003. A Browser-based Functional Classification SuperViewer  
1024 for Arabidopsis Genomics. *Curr Comput Mol Biol* 271–272.
- 1025 126. Oksanen J, Blanchet FG, Friendly M, Kindt R, Legendre P, McGlenn D, Minchin  
1026 PR, O’Hara RB, Simpson GL, Solymos P, Stevens MHH, Szoecs E, Wagner H.  
1027 2019. *vegan*: Community Ecology Package.
- 1028 127. Wickham H. 2016. *ggplot2: Elegant Graphics for Data Analysis*. Springer-Verlag,  
1029 New York.
- 1030 128. R Core Team. 2020. *R: A Language and Environment for Statistical Computing*. R  
1031 Foundation for Statistical Computing, Vienna, Austria.
- 1032 129. Hothorn T, Bretz F, Westfall P. 2008. Simultaneous Inference in General  
1033 Parametric Models. *Biometrical J* 50:346–363.
- 1034 130. Rivera Pérez CA, Schneider D, Daniel R, Polle A. 2021. Characterization of root  
1035 fungal community of European beech saplings. *Seq Read Arch (SRA)*  
1036 <https://www.ncbi.nlm.nih.gov/bioproject/736215>.
- 1037 131. Rivera Pérez CA, Janz D, Polle A. 2020. Transcription profiling of mycorrhized  
1038 European beech (*Fagus sylvatica* L.) roots in response to fertilization with  
1039 different forms of inorganic nitrogen. *ArrayExpress database*  
1040 <https://www.ebi.ac.uk/arrayexpress/experiments/E-MTAB-8931/>.
- 1041 132. Rivera Pérez CA, Janz D, Schneider D, Daniel R, Polle A. 2021. Mineral nitrogen

- 1042 nutrition of *Fagus sylvatica* L roots colonized by ectomycorrhizal fungi in native  
1043 forest soil. Dryad Dataset <https://doi.org/105061/dryad.zpc866t8v>.
- 1044 133. Walker AK, Frasz SL, Seifert KA, Miller JD, Mondo SJ, LaButti K, Lipzen A,  
1045 Dockter RB, Kennedy MC, Grigoriev I V., Spatafora JW. 2016. Erratum: Full  
1046 genome of *phialocephala scopiformis* daomc 229536, a fungal endophyte of  
1047 spruce producing the potent anti-insectan compound rugulosin [Genome  
1048 Announcements 4, 1, (2016) (e01768-15)] DOI: 10.1128/genomeA.01768-15.  
1049 Genome Announc 4:2–4.
- 1050 134. Kohler A, Kuo A, Nagy LG, Morin E, Barry KW, Buscot F, Canbäck B, Choi C,  
1051 Cichocki N, Clum A, Colpaert J, Copeland A, Costa MD, Doré J, Floudas D, Gay  
1052 G, Girlanda M, Henrissat B, Herrmann S, Hess J, Högberg N, Johansson T,  
1053 Khouja H-R, LaButti K, Lahrmann U, Levasseur A, Lindquist EA, Lipzen A,  
1054 Marmeisse R, Martino E, Murat C, Ngan CY, Nehls U, Plett JM, Pringle A, Ohm  
1055 RA, Perotto S, Peter M, Riley R, Rineau F, Ruytinx J, Salamov A, Shah F, Sun H,  
1056 Tarkka M, Tritt A, Veneault-Fourrey C, Zuccaro A, Tunlid A, Grigoriev I V., Hibbett  
1057 DS, Martin F. 2015. Convergent losses of decay mechanisms and rapid turnover  
1058 of symbiosis genes in mycorrhizal mutualists. *Nat Genet* 47:410–415.
- 1059 135. Martino E, Morin E, Grelet GA, Kuo A, Kohler A, Daghino S, Barry KW, Cichocki  
1060 N, Clum A, Dockter RB, Hainaut M, Kuo RC, LaButti K, Lindahl BD, Lindquist EA,  
1061 Lipzen A, Khouja HR, Magnuson J, Murat C, Ohm RA, Singer SW, Spatafora JW,  
1062 Wang M, Veneault-Fourrey C, Henrissat B, Grigoriev I V., Martin FM, Perotto S.  
1063 2018. Comparative genomics and transcriptomics depict ericoid mycorrhizal fungi  
1064 as versatile saprotrophs and plant mutualists. *New Phytol* 217:1213–1229.

- 1065 136. Riley R, Salamov AA, Brown DW, Nagy LG, Floudas D, Held BW, Levasseur A,  
1066 Lombard V, Morin E, Otilar R, Lindquist EA, Sun H, LaButti KM, Schmutz J,  
1067 Jabbour D, Luo H, Baker SE, Pisabarro AG, Walton JD, Blanchette RA, Henrissat  
1068 B, Martin F, Cullen D, Hibbett DS, Grigoriev I V. 2014. Erratum: Extensive  
1069 sampling of basidiomycete genomes demonstrates inadequacy of the white-  
1070 rot/brown-rot paradigm for wood decay fungi (Proceedings of the National  
1071 Academy of Sciences of the United States of America (2014) 111, 27 (9923-9928)  
1072 DOI: 10.1073/. Proc Natl Acad Sci U S A 111:14959.
- 1073 137. Miyauchi S, Kiss E, Kuo A, Drula E, Kohler A, Sánchez-García M, Morin E,  
1074 Andreopoulos B, Barry KW, Bonito G, Buée M, Carver A, Chen C, Cichocki N,  
1075 Clum A, Culley D, Crous PW, Fauchery L, Girlanda M, Hayes RD, Kéri Z, LaButti  
1076 K, Lipzen A, Lombard V, Magnuson J, Maillard F, Murat C, Nolan M, Ohm RA,  
1077 Pangilinan J, Pereira M de F, Perotto S, Peter M, Pfister S, Riley R, Sitrit Y,  
1078 Stielow JB, Szöllősi G, Žifčáková L, Štursová M, Spatafora JW, Tedersoo L,  
1079 Vaario LM, Yamada A, Yan M, Wang P, Xu J, Bruns T, Baldrian P, Vilgalys R,  
1080 Dunand C, Henrissat B, Grigoriev I V., Hibbett D, Nagy LG, Martin FM. 2020.  
1081 Large-scale genome sequencing of mycorrhizal fungi provides insights into the  
1082 early evolution of symbiotic traits. Nat Commun 11:1–17.
- 1083 138. Martin F, Aerts A, Ahrén D, Brun A, Danchin EGJ, Duchaussoy F, Gibon J, Kohler  
1084 A, Lindquist E, Pereda V, Salamov A, Shapiro HJ, Wuyts J, Blaudez D, Buée M,  
1085 Brokstein P, Canbäck B, Cohen D, Courty PE, Coutinho PM, Delaruelle C, Detter  
1086 JC, Deveau A, DiFazio S, Duplessis S, Fraissinet-Tachet L, Lucic E, Frey-Klett P,  
1087 Fourrey C, Feussner I, Gay G, Grimwood J, Hoegger PJ, Jain P, Kilaru S, Labbé



1088 J, Lin YC, Legué V, Le Tacon F, Marmeisse R, Melayah D, Montanini B, Muratet  
1089 M, Nehls U, Niculita-Hirzel H, Secq MPO Le, Peter M, Quesneville H, Rajashekar  
1090 B, Reich M, Rouhier N, Schmutz J, Yin T, Chalot M, Henrissat B, Kües U, Lucas  
1091 S, Van De Peer Y, Podila GK, Polle A, Pukkila PJ, Richardson PM, Rouzé P,  
1092 Sanders IR, Stajich JE, Tunlid A, Tuskan G, Grigoriev I V. 2008. The genome of  
1093 *Laccaria bicolor* provides insights into mycorrhizal symbiosis. *Nature* 452:88–92.  
1094

1095 **TABLE 1** Taxonomy of the genera representing the beech root-associated fungal community and the reference species  
 1096 chosen from the JGI MycoCosm database for mapping the RNA sequencing data

| Phylum        | Order         | Genus                | Species                                              | Trophic mode | Guild <sup>a</sup>                    | JGI short name | JGI name                               | JGI Reference |
|---------------|---------------|----------------------|------------------------------------------------------|--------------|---------------------------------------|----------------|----------------------------------------|---------------|
| Ascomycota    | Helotiales    | <i>Phialocephala</i> | <i>Phialocephala scopiformis</i>                     | symbiotroph  | endophyte                             | Phisc1         | Phialocephala scopiformis 5WS22E1 v1.0 | (133)         |
| Ascomycota    | Helotiales    | <i>Oidiodendron</i>  | <i>Oidiodendron maius</i>                            | symbiotroph  | ericoid mycorrhiza                    | Oidma1         | Oidiodendron maius Zn v1.0             | (134, 135)    |
| Ascomycota    | Helotiales    | <i>Meliniomyces</i>  | <i>Meliniomyces bicolor</i>                          | symbiotroph  | ectomycorrhiza and ericoid mycorrhiza | Melbi2         | Meliniomyces bicolor E v2.0            | (135)         |
| Ascomycota    | Mytilinidales | <i>Cenococcum</i>    | <i>Cenococcum geophilum</i>                          | symbiotroph  | ectomycorrhiza                        | Cenge3         | Cenococcum geophilum 1.58 v2.0         | (82)          |
| Basidiomycota | Agaricales    | <i>Galerina</i>      | <i>Galerina marginata</i>                            | saprotroph   | saprotroph                            | Galma1         | Galerina marginata v1.0                | (136)         |
| Basidiomycota | Agaricales    | <i>Mycena</i>        | <i>Mycena galopus</i>                                | saprotroph   | leaf litter decomposer                | Mycgal1        | Mycena galopus ATCC-62051 v1.0         | (137)         |
| Basidiomycota | Agaricales    | <i>Amanita</i>       | <i>Amanita muscaria</i>                              | symbiotroph  | ectomycorrhiza                        | Amamu1         | Amanita muscaria Koide v1.0            | (134)         |
| Basidiomycota | Agaricales    | <i>Amanita</i>       | <i>Amanita rubescens</i>                             | symbiotroph  | ectomycorrhiza                        | Amarub1        | Amanita rubescens Přilba v1.0          | (137)         |
| Basidiomycota | Agaricales    | <i>Cortinarius</i>   | <i>Cortinarius glaucopus</i>                         | symbiotroph  | ectomycorrhiza                        | Corgl3         | Cortinarius glaucopus AT 2004 276 v2.0 | (137)         |
| Basidiomycota | Agaricales    | <i>Laccaria</i>      | <i>Laccaria amethystina</i>                          | symbiotroph  | ectomycorrhiza                        | Lacam2         | Laccaria amethystina LaAM-08-1 v2.0    | (134)         |
| Basidiomycota | Agaricales    | <i>Laccaria</i>      | <i>Laccaria bicolor</i>                              | symbiotroph  | ectomycorrhiza                        | Lacbi2         | Laccaria bicolor v2.0                  | (138)         |
| Basidiomycota | Boletales     | <i>Imleria</i>       | <i>Imleria badia</i><br>syn: <i>Xerocomus badius</i> | symbiotroph  | ectomycorrhiza (saprobic abilities)   | Xerba1         | Xerocomus badius 84.06 v1.0            | (137)         |
| Basidiomycota | Boletales     | <i>Boletus</i>       | <i>Boletus edulis</i>                                | symbiotroph  | ectomycorrhiza                        | Boledp1        | Boletus edulis Přilba v1.0             | (137)         |

|               |               |                    |                              |             |                |         |                                      |       |
|---------------|---------------|--------------------|------------------------------|-------------|----------------|---------|--------------------------------------|-------|
| Basidiomycota | Boletales     | <i>Scleroderma</i> | <i>Scleroderma citrinum</i>  | symbiotroph | ectomycorrhiza | Scsci1  | Scleroderma citrinum Foug A v1.0     | (134) |
| Basidiomycota | Russulales    | <i>Russula</i>     | <i>Russula ochroleuca</i>    | symbiotroph | ectomycorrhiza | Rusoch1 | Russula ochroleuca Přilba v1.0       | (137) |
| Basidiomycota | Russulales    | <i>Lactarius</i>   | <i>Lactarius quietus</i>     | symbiotroph | ectomycorrhiza | Lacqui1 | Lactarius quietus S23C v1.0          | (137) |
| Basidiomycota | Thelephorales | <i>Thelephora</i>  | <i>Thelephora terrestris</i> | symbiotroph | ectomycorrhiza | Theter1 | Thelephora terrestris UH-Tt-Lm1 v1.0 | (137) |

1097 <sup>a</sup>Guild: the type of known trophic mode at the species level (i.e., the species used as reference for mapping the RNA  
1098 sequence read data).

1099 **TABLE 2** KEGG pathway enrichment analysis of the ectomycorrhizal fungi metatranscriptome<sup>b</sup>

| Term       | Term name                                   | P adjusted |
|------------|---------------------------------------------|------------|
| KEGG:01100 | Metabolic pathways                          | 5.3E-17    |
| KEGG:01110 | Biosynthesis of secondary metabolites       | 7.3E-11    |
| KEGG:00230 | Purine metabolism                           | 8.1E-07    |
| KEGG:01230 | Biosynthesis of amino acids                 | 9.4E-05    |
| KEGG:01200 | Carbon metabolism                           | 1.3E-04    |
| KEGG:00010 | Glycolysis / Gluconeogenesis                | 2.5E-03    |
| KEGG:00620 | Pyruvate metabolism                         | 5.9E-03    |
| KEGG:00520 | Amino sugar and nucleotide sugar metabolism | 2.4E-02    |
| KEGG:00030 | Pentose phosphate pathway                   | 2.5E-02    |
| KEGG:00220 | Arginine biosynthesis                       | 2.9E-02    |
| KEGG:00240 | Pyrimidine metabolism                       | 2.9E-02    |
| KEGG:00680 | Methane metabolism                          | 6.3E-02    |
| KEGG:00261 | Monobactam biosynthesis                     | 6.3E-02    |
| KEGG:00250 | Alanine, aspartate and glutamate metabolism | 6.3E-02    |
| KEGG:00910 | Nitrogen metabolism                         | 6.3E-02    |

1100 <sup>b</sup>Enrichment analysis was performed in g:Profiler against the ascomycete *Aspergillus oryzae* (version  
 1101 e100\_eg47\_p14\_7733820; date: 10/20/2020) since the model organism *Laccaria bicolor* is not available in g:Profiler.  
 1102 Terms indicate the KEGG pathways to which EC numbers are mapped; Term name indicates the KEGG pathways; P  
 1103 adjusted is the FDR corrected p value.

**TABLE 3** Biomass and root and soil chemistry in control and <sup>15</sup>N-ammonium or <sup>15</sup>N-nitrate treated cosms<sup>c</sup>

| Variable                                                     | Control                 | Ammonium               | Nitrate                | F value       | P value         |
|--------------------------------------------------------------|-------------------------|------------------------|------------------------|---------------|-----------------|
| Biomass of CR (g cosm <sup>-1</sup> )                        | 3.44 ± 1.37 a           | 2.87 ± 1.21 a          | 3.40 ± 1.16 a          | 0.5395        | 0.5905          |
| Biomass of FR (g cosm <sup>-1</sup> )                        | 0.88 ± 0.47 a           | 0.66 ± 0.41 a          | 0.70 ± 0.28 a          | 0.6865        | 0.5138          |
| Biomass of EMF_RA (g cosm <sup>-1</sup> )                    | 0.32 ± 0.17 a           | 0.23 ± 0.04 a          | 0.20 ± 0.08 a          | 0.0759        | 0.9275          |
| Soil dry mass (g cosm <sup>-1</sup> )                        | 1227 ± 202 a            | 1149 ± 310 a           | 1155 ± 466 a           | 0.141         | 0.8693          |
| <sup>15</sup> N enrichment (mg g <sup>-1</sup> CR)           | na                      | <b>0.11 ± 0.03 b</b>   | <b>0.06 ± 0.02 a</b>   | <b>9.8675</b> | <b>0.008512</b> |
| <sup>15</sup> N enrichment (mg g <sup>-1</sup> FR)           | na                      | 0.27 ± 0.11 a          | 0.21 ± 0.04 a          | 1.1993        | 0.295           |
| <sup>15</sup> N enrichment (mg g <sup>-1</sup> EMRT)         | na                      | 0.64 ± 0.45 a          | 0.52 ± 0.11 a          | 0.0285        | 0.8768          |
| <sup>15</sup> N enrichment (mg g <sup>-1</sup> soil)         | na                      | 0.0171 ± 0.0062 a      | 0.0237 ± 0.017 a       | 0.8583        | 0.3725          |
| <sup>15</sup> N enrichment in roots (mg cosm <sup>-1</sup> ) | na                      | 0.53 ± 0.25 a          | 0.42 ± 0.22 a          | 0.7395        | 0.4067          |
| <sup>15</sup> N enrichment in soil (mg cosm <sup>-1</sup> )  | na                      | 18.35 ± 4.63 a         | 20.76 ± 6.38 a         | 0.6558        | 0.4338          |
| N (mg g <sup>-1</sup> CR)                                    | 9.16 ± 2.28 a           | 10.48 ± 2.29 a         | 9.19 ± 1.77 a          | 0.9419        | 0.4065          |
| N (mg g <sup>-1</sup> FR)                                    | <b>12.90 ± 1.72 a</b>   | <b>14.68 ± 1.60 ab</b> | <b>15.13 ± 1.36 b</b>  | <b>4.5612</b> | <b>0.02334</b>  |
| N (mg g <sup>-1</sup> EMRT)                                  | 16.07 ± 4.83 a          | 17.44 ± 0.06 a         | 18.69 ± 1.85 a         | 0.4571        | 0.6507          |
| N (mg g <sup>-1</sup> soil)                                  | 4.34 ± 3.06 a           | 3.98 ± 2.93 a          | 4.61 ± 3.85 a          | 4e-04         | 0.9996          |
| C (mg g <sup>-1</sup> CR)                                    | <b>450.95 ± 5.74 ab</b> | <b>456.03 ± 8.04 b</b> | <b>444.97 ± 7.16 a</b> | <b>4.4774</b> | <b>0.02472</b>  |
| C (mg g <sup>-1</sup> FR)                                    | 479.61 ± 14.80 a        | 472.13 ± 21.32 a       | 467.36 ± 13.35 a       | 1.1062        | 0.3502          |
| C (mg g <sup>-1</sup> EMRT)                                  | 435.74 ± 93.60 a        | 462.10 ± 1.65 a        | 465.03 ± 9.07 a        | 0.202         | 0.8217          |
| C (mg g <sup>-1</sup> soil)                                  | 114.99 ± 88.14 a        | 104.78 ± 82.78 a       | 123.77 ± 113.81 a      | 0.0699        | 9.9327          |
| C:N ratio in CR                                              | 51.93 ± 12.41 a         | 45.32 ± 10.40 a        | 50.00 ± 9.54 a         | 0.7282        | 0.4951          |
| C:N ratio in FR                                              | <b>37.70 ± 4.75 b</b>   | <b>32.38 ± 2.43 a</b>  | <b>31.05 ± 2.20 a</b>  | <b>7.8149</b> | <b>0.003106</b> |
| C:N ratio in EMRT                                            | 28.12 ± 6.45 a          | 26.54 ± 0.00 a         | 25.02 ± 2.05 a         | 0.3095        | 0.7434          |
| C:N ratio in soil                                            | 25.75 ± 2.90 a          | 25.78 ± 2.21 a         | 25.42 ± 2.75 a         | 0.0423        | 0.9586          |

|                                                        |                 |                 |                |        |        |
|--------------------------------------------------------|-----------------|-----------------|----------------|--------|--------|
| N-NH <sub>4</sub> <sup>+</sup> (mg g <sup>-1</sup> FR) | 0.11 ± 0.03 a   | 0.09 ± 0.03 a   | 0.09 ± 0.03 a  | 0.3329 | 0.7253 |
| N-NO <sub>3</sub> <sup>-</sup> (mg g <sup>-1</sup> FR) | 1.96 ± 0.32 a   | 2.59 ± 0.73 a   | 1.87 ± 0.46 a  | 2.2306 | 0.1634 |
| Glucose (mg g <sup>-1</sup> FR)                        | 16.99 ± 2.73 a  | 16.32 ± 2.20 a  | 16.36 ± 1.98 a | 0.1062 | 0.9003 |
| Fructose (mg g <sup>-1</sup> FR)                       | 9.06 ± 1.23 a   | 8.51 ± 1.84 a   | 7.71 ± 0.90 a  | 0.9712 | 0.415  |
| Sucrose (mg g <sup>-1</sup> FR)                        | 0.61 ± 0.47 a   | 0.51 ± 1.02 a   | 0.82 ± 1.64 a  | 0.0759 | 0.9275 |
| Starch (mg g <sup>-1</sup> FR)                         | 21.20 ± 11.95 a | 18.40 ± 8.66 a  | 16.03 ± 5.20 a | 0.2411 | 0.7907 |
| TNSC (mg g <sup>-1</sup> FR)                           | 47.87 ± 14.25 a | 43.75 ± 12.51 a | 40.93 ± 6.33 a | 0.3484 | 0.7149 |

1105 <sup>c</sup>Analyses were conducted two days after watering each cosm with 35 mg <sup>15</sup>N. Mean soil pH was 3.6 ± 0.1 and mean relative  
1106 soil water content was 47.6 ± 28.9% (n = 25) across all studied cosms. Data in table shows means ± SD for dry samples.  
1107 For dry mass: control (n = 9), ammonium (n = 8), nitrate (n = 8). For <sup>15</sup>N, C and N: control (n = 9), ammonium (n = 7), nitrate  
1108 (n = 7), except for root tips where control (n = 5), ammonium (n = 2), nitrate (n = 3). For ammonium-N, nitrate-N and non-  
1109 structural carbohydrates in FR, n = 4 per treatment. Significant differences among treatments (control, ammonium, nitrate)  
1110 at p < 0.05 (Tukey HSD test) are shown in rows and marked in bold. Abbreviations: coarse roots (CR), fine roots (FR),  
1111 ectomycorrhizal root tips (EMRTs), TNSC (total non-structural carbohydrates), na = not applicable because mean <sup>15</sup>N values  
1112 of non-labeled controls were subtracted from the <sup>15</sup>N-treated samples.

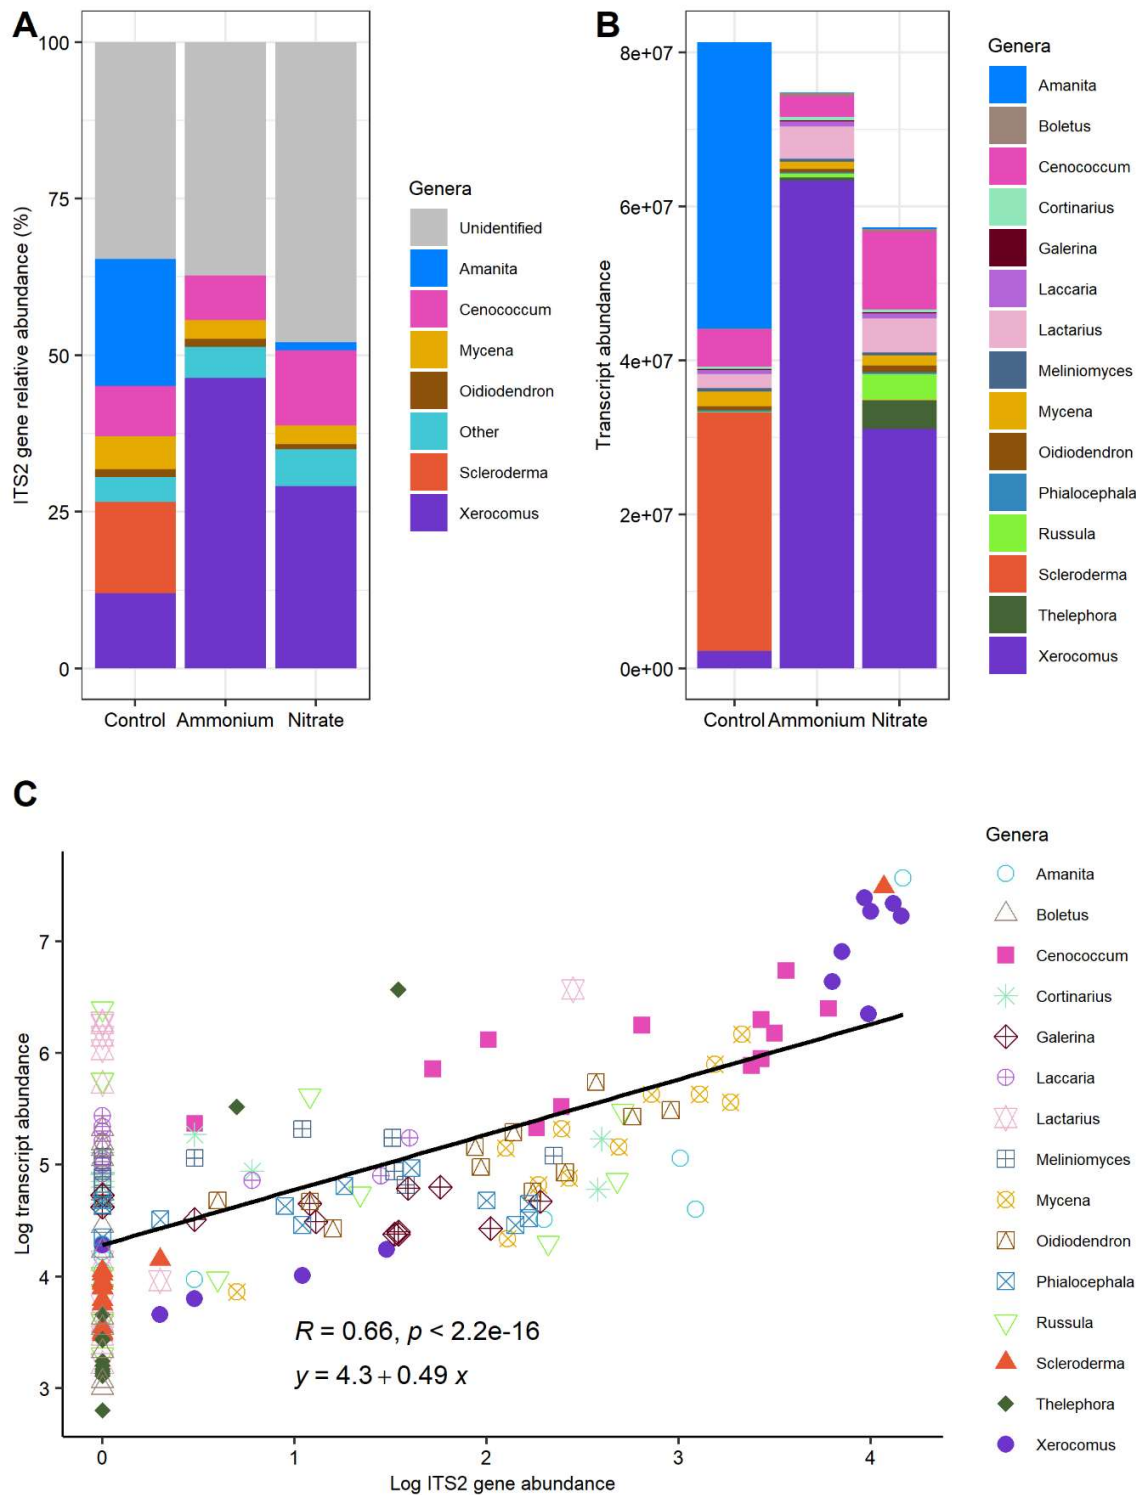

1113

1114 **FIG 1** Relative abundance of root-associated (RAF) fungi based on ITS2 barcoding (A),

1115 raw counts of the metabolically active fungi based on RNA sequencing characterized by

1116 taxonomy (B) and Pearson correlation between DNA-based and RNA-based  
1117 abundances of the fungal genera (C). RAF were studied on roots of European beech  
1118 (*Fagus sylvatica*) grown in native forest soil, treated with either water (control),  
1119 ammonium or nitrate for two days before harvest, (n = 4 per treatment).



1120

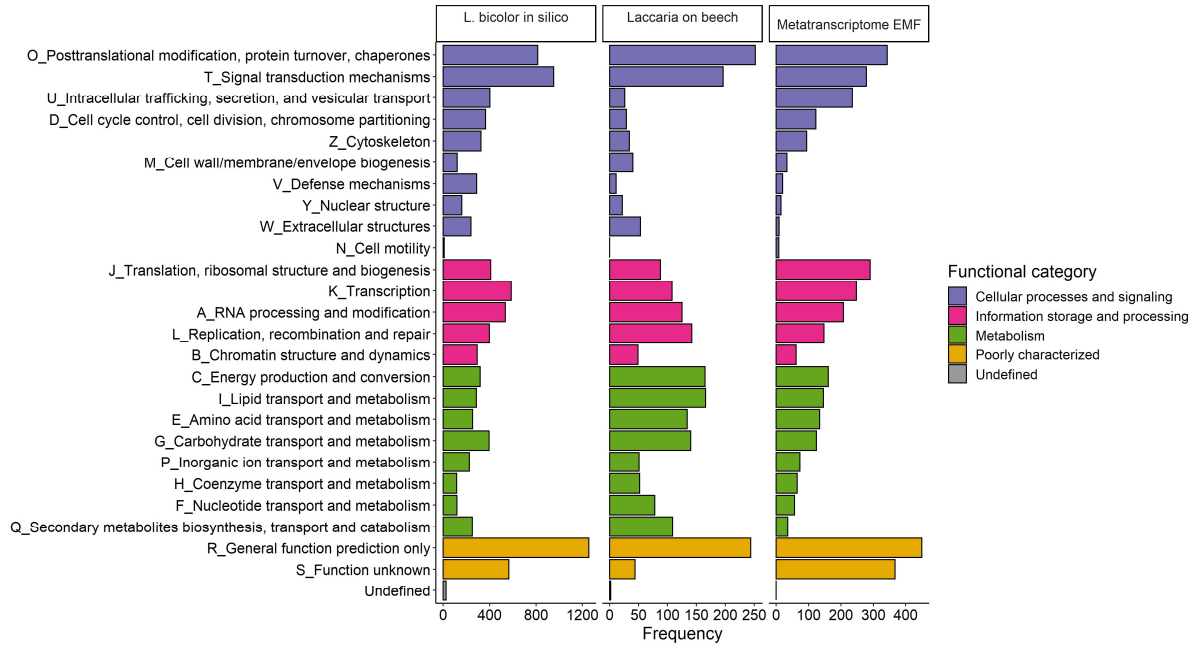

1121

1122 **FIG 2.** Functional classification of the ectomycorrhizal fungi (EMF) metatranscriptome  
 1123 according to KOG functional groups. The figure shows the distribution of KOG functions  
 1124 for the model ectomycorrhizal fungus *Laccaria bicolor* (*in silico* analyses of the  
 1125 published genome (138)), KOG functions in the transcriptome of the genus *Laccaria* in  
 1126 this experiment (*Laccaria* on beech), and in the entire ectomycorrhizal fungal  
 1127 metatranscriptome in this experiment (Metatranscriptome EMF).

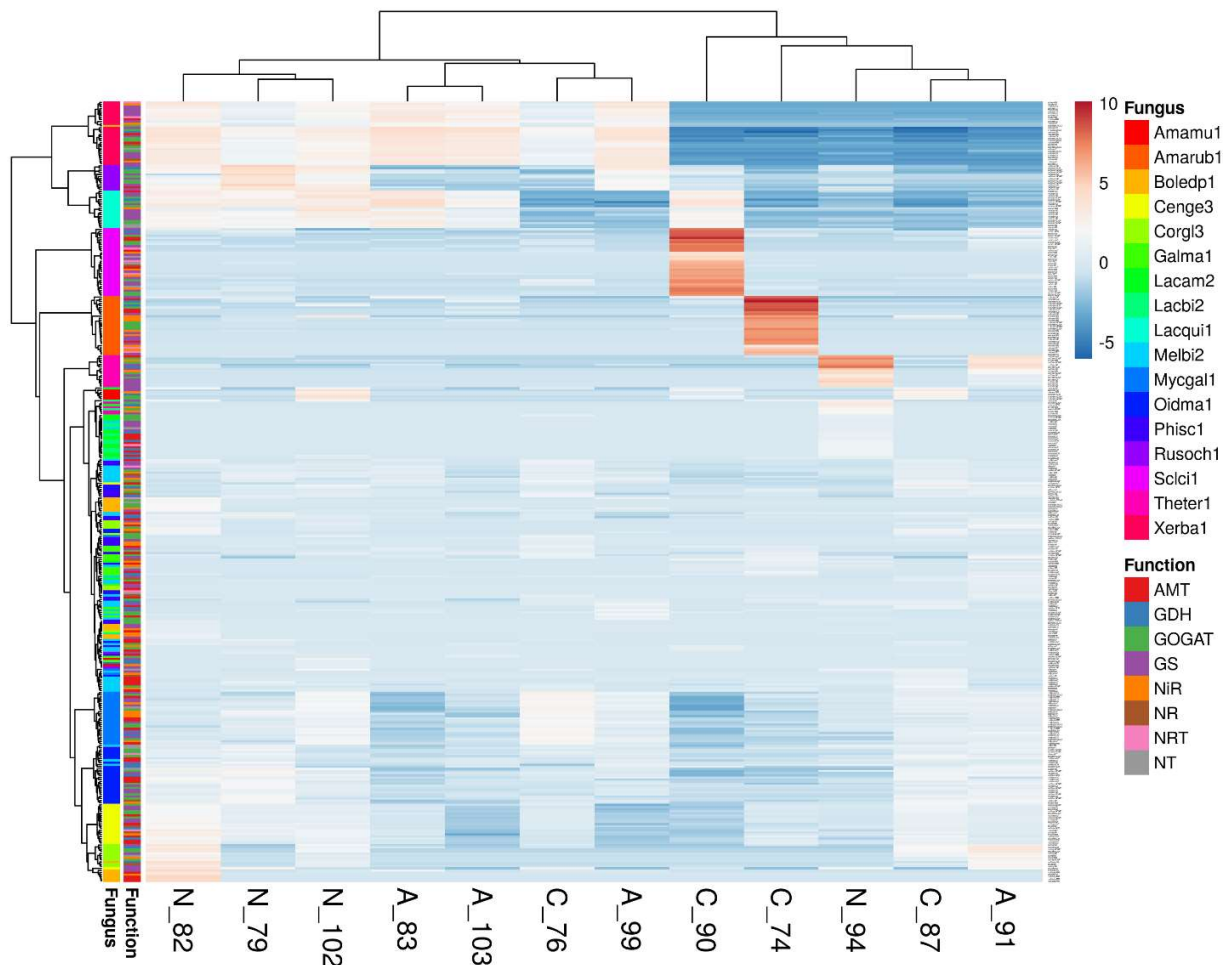

1129 **FIG 3:** Cluster analysis of N-related transporters and enzymes represented by transcript  
1130 abundances for ectomycorrhizal, endophytic and saprotrophic fungi colonizing beech  
1131 roots. C = control, A = ammonium treatment, N = nitrate treatment, abbreviations for the  
1132 fungi are shown in Table 1. Original values of the transcript levels were  $\ln(x + 1)$ -  
1133 transformed. Rows are centered; no scaling is applied to rows. Both rows and columns  
1134 are clustered using Euclidean distance and Ward linkage. 369 rows, 12 columns.

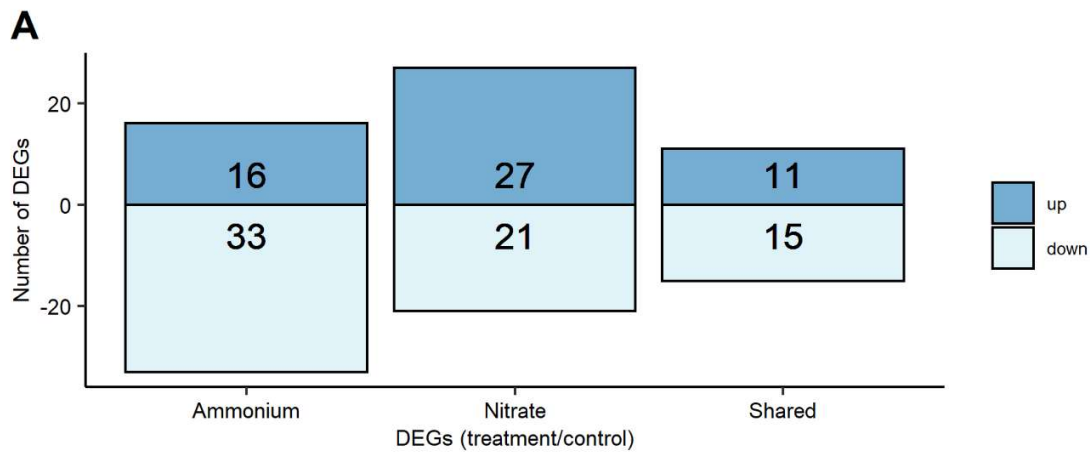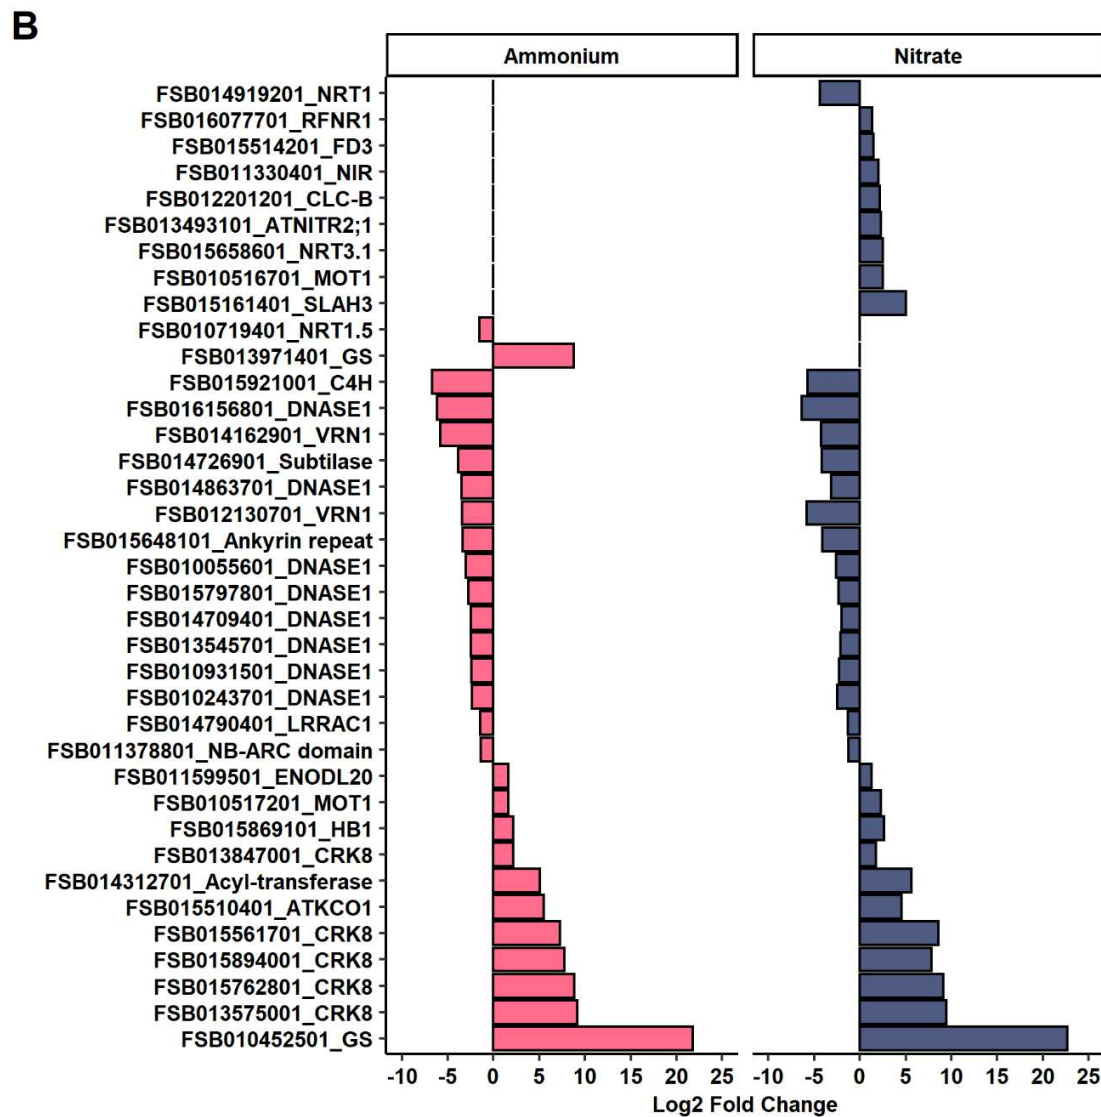

1136 **FIG 4** Differentially expressed genes (DEGs) in response to ammonium or nitrate  
1137 exposure. A) Number of unique and shared DEGs ( $p_{adj} < 0.05$  and 2-fold change) in  
1138 response to ammonium or nitrate treatment. B) Log<sub>2</sub>-fold changes of shared DEGs and  
1139 DEGs related to N-metabolisms in beech roots in response to increased ammonium or  
1140 nitrate treatment relative to control conditions (n = 4 per treatment). The complete  
1141 information, gene model ID and names are provided in Data set 5.

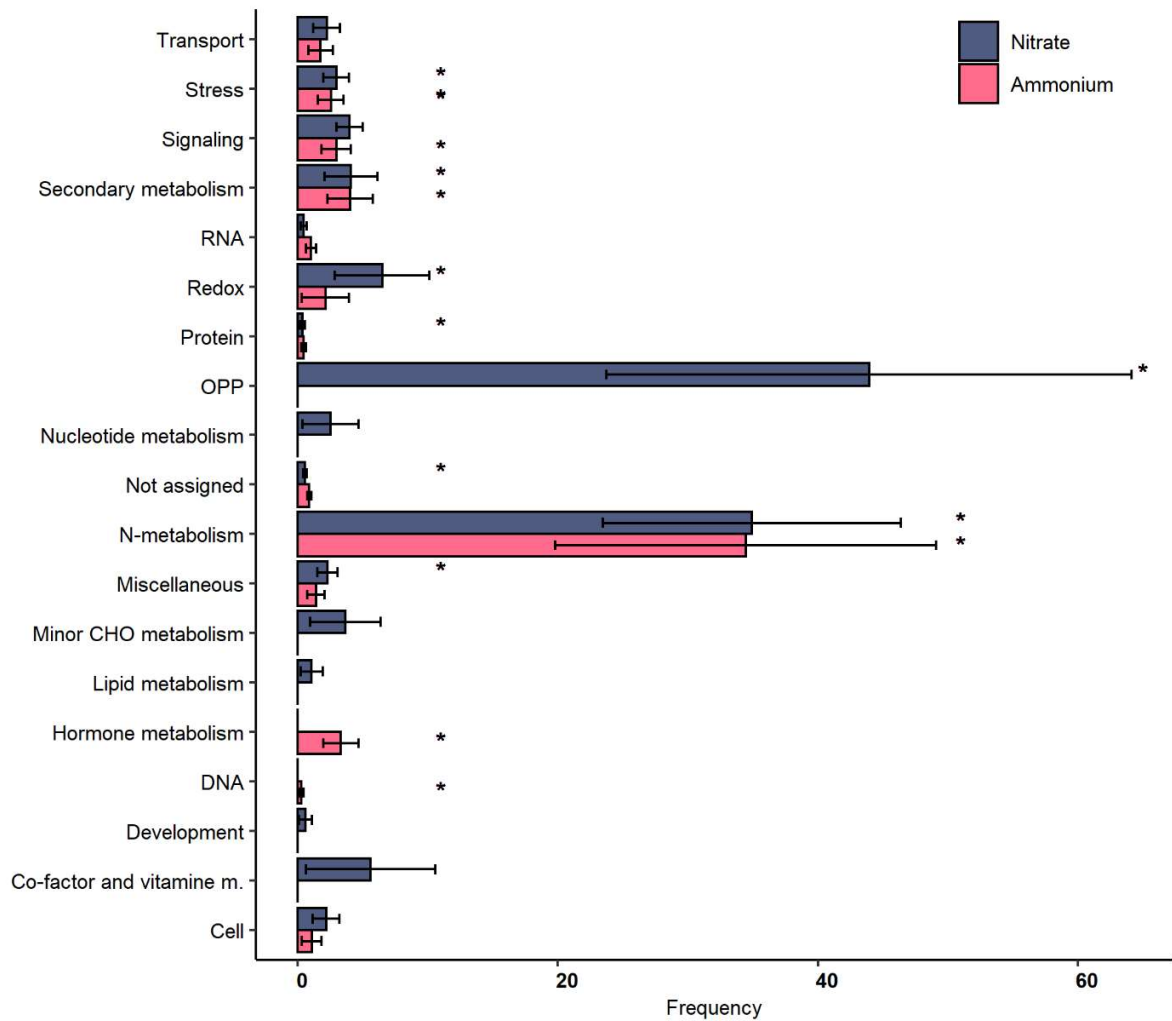

1142

1143 **FIG 5** Classification of beech root DEGs in response to nitrate or ammonium treatment.

1144 Genes were classified according to Mapman bins using Classification supervisor in

1145 BAR ([http://bar.utoronto.ca/ntools/cgi-bin/ntools\\_classification\\_supervisor.cgi](http://bar.utoronto.ca/ntools/cgi-bin/ntools_classification_supervisor.cgi)). Bins

1146 that were statistically significantly enriched are marked by an asterisk.

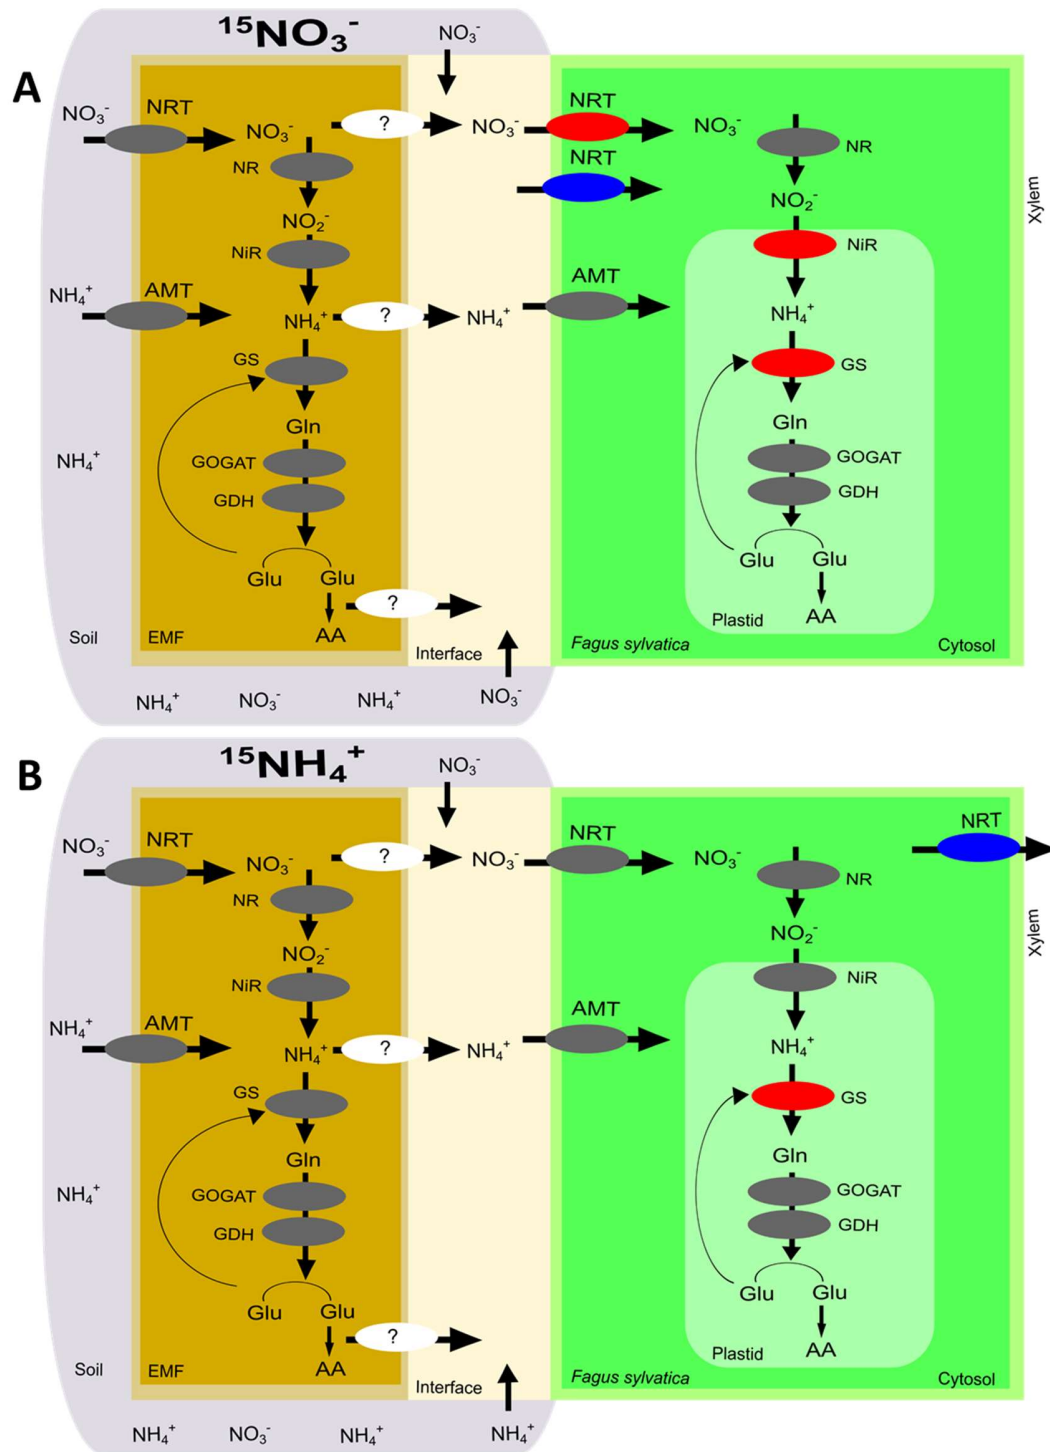

1147

1148 **FIG 6** Scheme of the pathway for N uptake and assimilation in EMF and *Fagus sylvatica*  
 1149 based on transcription profiles. Regulation of ectomycorrhizal fungi and host transcripts  
 1150 encoding for transporters and enzymes involved in N uptake and assimilation detected

1151 in the nitrate treatment (A) and in the ammonium treatment (B). NRT: nitrate/nitrite  
1152 transporter, NR: nitrate reductase, NiR: nitrite reductase; AMT: ammonium transporter,  
1153 GS: glutamine synthetase, GOGAT: glutamate synthase; GDH: glutamate  
1154 dehydrogenase. Gray: detected but not regulated, Red: upregulated, Blue:  
1155 downregulated, White: not detected.
